# Supplementary material for: Structurally diverse diterpenoid alkaloids from the lateral roots of Aconitum carmichaelii Debx. and their anti-tumor activities based on in vitro systematic evaluation and network pharmacology analysis
Source: Royal Society of Chemistry journal article supplement (doi:10.1039/d1ra04223h), 2021-01-01
Supplement: d1ra04223h1.pdf [file d1ra04223h1.pdf]

## Supplementary Information:

### **Structurally diverse diterpenoid alkaloids from the lateral roots of *Aconitum carmichaelii* Debx. and their anti-tumor activities based on *in vitro* systematic evaluation and network pharmacology analysis**

Yang Yu,<sup>ab</sup> Shifei Wu,<sup>a</sup> Jianqing Zhang,<sup>a</sup> Jiayuan Li,<sup>a</sup> Changliang Yao,<sup>a</sup> Wenyong Wu,<sup>ac</sup> Yingying Wang,<sup>ac</sup> Hongjian Ji,<sup>ac</sup> Wenlong Wei,<sup>a</sup> Min Gao,<sup>ab</sup> Yun Li,<sup>ad</sup> Shuai Yao,<sup>a</sup> Yong Huang,<sup>a</sup> Qirui Bi,<sup>a</sup> Hua Qu<sup>ac</sup> and De-an Guo<sup>\*ab</sup>

<sup>a</sup>. Shanghai Research Center for Modernization of Traditional Chinese Medicine, National Engineering Laboratory for TCM Standardization Technology, Shanghai Institute of Materia Medica, Chinese Academy of Sciences, Shanghai 201203, China. E-mail: daguo@simm.ac.cn

<sup>b</sup>. University of Chinese Academy of Sciences, Beijing 100049, China

<sup>c</sup>. School of Chinese Materia Medica, Nanjing University of Chinese Medicine, Nanjing 210023, China

<sup>d</sup>. School of Traditional Chinese Pharmacy, China Pharmaceutical University, Nanjing 210009, China

## Table of Contents

| No.               | Contents                                                                                                          | Page |
|-------------------|-------------------------------------------------------------------------------------------------------------------|------|
| <b>Table S1</b>   | The 1D and 2D NMR data of compound <b>26</b> in CDCl <sub>3</sub>                                                 | 4    |
| <b>Table S2</b>   | The 1D and 2D NMR data of compound <b>37</b> in CDCl <sub>3</sub>                                                 | 5    |
| <b>Table S3</b>   | Top 21 target genes with degree values not less than 45                                                           | 6    |
| <b>Table S4</b>   | Enrichment analysis results of 173 target genes                                                                   | 7    |
| <b>Figure S1</b>  | The <sup>1</sup> H NMR spectrum of compound <b>1</b> in DMSO-d <sub>6</sub> (500 MHz)                             | 10   |
| <b>Figure S2</b>  | The <sup>13</sup> C NMR spectrum of compound <b>1</b> in DMSO-d <sub>6</sub> (125 MHz)                            | 11   |
| <b>Figure S3</b>  | The HSQC spectrum of compound <b>1</b> in DMSO-d <sub>6</sub>                                                     | 12   |
| <b>Figure S4</b>  | The <sup>1</sup> H- <sup>1</sup> H COSY spectrum of compound <b>1</b> in DMSO-d <sub>6</sub>                      | 13   |
| <b>Figure S5</b>  | The HMBC spectrum of compound <b>1</b> in DMSO-d <sub>6</sub>                                                     | 14   |
| <b>Figure S6</b>  | The NOESY spectrum of compound <b>1</b> in DMSO-d <sub>6</sub>                                                    | 15   |
| <b>Figure S7</b>  | The IR spectrum of compound <b>1</b>                                                                              | 16   |
| <b>Figure S8</b>  | The HR-ESI-MS data of compound <b>1</b>                                                                           | 16   |
| <b>Figure S9</b>  | The UHPLC-MS single ion recording (SIR) chromatograms for sugar configuration confirmation of compound <b>1</b> . | 17   |
| <b>Figure S10</b> | The <sup>1</sup> H NMR spectrum of compound <b>14a</b> in CDCl <sub>3</sub> (500 MHz)                             | 18   |
| <b>Figure S11</b> | The <sup>13</sup> C NMR spectrum of compound <b>14a</b> in CDCl <sub>3</sub> (125 MHz)                            | 19   |
| <b>Figure S12</b> | The HSQC spectrum of compound <b>14a</b> in CDCl <sub>3</sub>                                                     | 20   |
| <b>Figure S13</b> | The <sup>1</sup> H- <sup>1</sup> H COSY spectrum of compound <b>14a</b> in CDCl <sub>3</sub>                      | 21   |
| <b>Figure S14</b> | The HMBC spectrum of compound <b>14a</b> in CDCl <sub>3</sub>                                                     | 22   |
| <b>Figure S15</b> | The NOESY spectrum of compound <b>14a</b> in CDCl <sub>3</sub>                                                    | 23   |
| <b>Figure S16</b> | The <sup>1</sup> H NMR spectrum of compound <b>14</b> in CDCl <sub>3</sub> (600 MHz)                              | 24   |
| <b>Figure S17</b> | The <sup>13</sup> C NMR spectrum of compound <b>14</b> in CDCl <sub>3</sub> (150 MHz)                             | 25   |
| <b>Figure S18</b> | The IR spectrum of compound <b>14</b>                                                                             | 25   |
| <b>Figure S19</b> | The HR-ESI-MS data of compound <b>14a</b>                                                                         | 26   |
| <b>Figure S20</b> | The HR-ESI-MS data of compound <b>14</b>                                                                          | 26   |
| <b>Figure S21</b> | The <sup>1</sup> H NMR spectrum of compound <b>17</b> in CDCl <sub>3</sub> (600 MHz)                              | 27   |
| <b>Figure S22</b> | The <sup>13</sup> C NMR spectrum of compound <b>17</b> in CDCl <sub>3</sub> (150 MHz)                             | 28   |
| <b>Figure S23</b> | The HSQC spectrum of compound <b>17</b> in CDCl <sub>3</sub>                                                      | 29   |
| <b>Figure S24</b> | The <sup>1</sup> H- <sup>1</sup> H COSY spectrum of compound <b>17</b> in CDCl <sub>3</sub>                       | 30   |
| <b>Figure S25</b> | The HMBC spectrum of compound <b>17</b> in CDCl <sub>3</sub>                                                      | 31   |
| <b>Figure S26</b> | The NOESY spectrum of compound <b>17</b> in CDCl <sub>3</sub>                                                     | 32   |
| <b>Figure S27</b> | The IR spectrum of compound <b>17</b>                                                                             | 33   |
| <b>Figure S28</b> | The HR-ESI-MS data of compound <b>17</b>                                                                          | 33   |
| <b>Figure S29</b> | The <sup>1</sup> H NMR spectrum of compound <b>25</b> in CDCl <sub>3</sub> (500 MHz)                              | 34   |
| <b>Figure S30</b> | The <sup>13</sup> C NMR spectrum of compound <b>25</b> in CDCl <sub>3</sub> (125 MHz)                             | 35   |
| <b>Figure S31</b> | The HSQC spectrum of compound <b>25</b> in CDCl <sub>3</sub>                                                      | 36   |
| <b>Figure S32</b> | The <sup>1</sup> H- <sup>1</sup> H COSY spectrum of compound <b>25</b> in CDCl <sub>3</sub>                       | 37   |
| <b>Figure S33</b> | The HMBC spectrum of compound <b>25</b> in CDCl <sub>3</sub>                                                      | 38   |
| <b>Figure S34</b> | The NOESY spectrum of compound <b>25</b> in CDCl <sub>3</sub>                                                     | 39   |
| <b>Figure S35</b> | The IR spectrum of compound <b>25</b>                                                                             | 40   |
| <b>Figure S36</b> | The HR-ESI-MS data of compound <b>25</b>                                                                          | 40   |
| <b>Figure S37</b> | The <sup>1</sup> H NMR spectrum of compound <b>26</b> in CDCl <sub>3</sub> (600 MHz)                              | 41   |
| <b>Figure S38</b> | The <sup>13</sup> C NMR spectrum of compound <b>26</b> in CDCl <sub>3</sub> (150 MHz)                             | 42   |
| <b>Figure S39</b> | The HSQC spectrum of compound <b>26</b> in CDCl <sub>3</sub>                                                      | 43   |
| <b>Figure S40</b> | The <sup>1</sup> H- <sup>1</sup> H COSY spectrum of compound <b>26</b> in CDCl <sub>3</sub>                       | 44   |
| <b>Figure S41</b> | The HMBC spectrum of compound <b>26</b> in CDCl <sub>3</sub>                                                      | 45   |
| <b>Figure S42</b> | The NOESY spectrum of compound <b>26</b> in CDCl <sub>3</sub>                                                     | 46   |
| <b>Figure S43</b> | The IR spectrum of compound <b>26</b>                                                                             | 47   |
| <b>Figure S44</b> | The HR-ESI-MS data of compound <b>26</b>                                                                          | 47   |

|                   |                                                                                             |           |
|-------------------|---------------------------------------------------------------------------------------------|-----------|
| <b>Figure S45</b> | The <sup>1</sup> H NMR spectrum of compound <b>37</b> in CDCl <sub>3</sub> (600 MHz)        | <b>48</b> |
| <b>Figure S46</b> | The <sup>13</sup> C NMR spectrum of compound <b>37</b> in CDCl <sub>3</sub> (150 MHz)       | <b>49</b> |
| <b>Figure S47</b> | The HSQC spectrum of compound <b>37</b> in CDCl <sub>3</sub>                                | <b>50</b> |
| <b>Figure S48</b> | The <sup>1</sup> H- <sup>1</sup> H COSY spectrum of compound <b>37</b> in CDCl <sub>3</sub> | <b>51</b> |
| <b>Figure S49</b> | The HMBC spectrum of compound <b>37</b> in CDCl <sub>3</sub>                                | <b>52</b> |
| <b>Figure S50</b> | The NOESY spectrum of compound <b>37</b> in CDCl <sub>3</sub>                               | <b>53</b> |
| <b>Figure S51</b> | The IR spectrum of compound <b>37</b>                                                       | <b>54</b> |
| <b>Figure S52</b> | The HR-ESI-MS data of compound <b>37</b>                                                    | <b>54</b> |
| <b>Figure S53</b> | The representative IC <sub>50</sub> curves of compounds <b>1-20</b>                         | <b>55</b> |
| <b>Figure S54</b> | The representative IC <sub>50</sub> curves of compounds <b>21-37</b>                        | <b>56</b> |

---

**Table S1** The 1D and 2D NMR data of compound **26** in CDCl<sub>3</sub>.

| No.                                 | $\delta_H$ (ppm) ( <i>J</i> in Hz) | $\delta_C$ (ppm) | <sup>1</sup> H- <sup>1</sup> H COSY | HMBC                                                   | NOESY                                                                              |
|-------------------------------------|------------------------------------|------------------|-------------------------------------|--------------------------------------------------------|------------------------------------------------------------------------------------|
| 1                                   | 3.35-3.38 (1H, m)                  | 81.5             | H-2a; H-2b                          | C-10                                                   | H-10                                                                               |
| 2a                                  | 1.96-2.09 (1H, m)                  | 23.1             | H-1; H-2b; H-3                      | -                                                      | H-2b                                                                               |
| 2b                                  | 1.39-1.51 (1H, m)                  |                  | H-1; H-2a; H-3                      | -                                                      | H-2a; H-5; H-12b                                                                   |
| 3                                   | 1.80-1.93 (2H, m)                  | 28.9             | H-2a; H-2b                          | -                                                      | -                                                                                  |
| 4                                   | -                                  | 38.4             | -                                   | -                                                      | -                                                                                  |
| 5                                   | 2.31 (1H, d, <i>J</i> =6.6 Hz)     | 42.1             | H-6                                 | C-4; C-7; C-11; C-17; C-18; C-19                       | H-2b; H-6; H-18a                                                                   |
| 6                                   | 4.10 (1H, d, <i>J</i> =6.6 Hz)     | 82.2             | H-5                                 | C-4; C-7; C-8; C-17; 6-OMe                             | H-5; H-9; 6-OMe                                                                    |
| 7                                   | 2.82-2.91 (1H, m)                  | 43.5             | -                                   | C-8; C-9; C-11; C-17                                   | 8-OCH <sub>2</sub> CH <sub>3</sub>                                                 |
| 8                                   | -                                  | 82.5             | -                                   | -                                                      | -                                                                                  |
| 9                                   | 2.63 (1H, t, <i>J</i> =6.2 Hz)     | 44.3             | H-10; H-14                          | C-8; C-10; C-12; C-13                                  | H-6; H-10; H-14                                                                    |
| 10                                  | 2.14-2.22 (1H, m)                  | 40.7             | H-9                                 | -                                                      | H-1; H-9                                                                           |
| 11                                  | -                                  | 50.9             | -                                   | -                                                      | -                                                                                  |
| 12a                                 | 2.22-2.29 (1H, m)                  | 35.9             | H-12b                               | C-10; C-13; C-16                                       | H-14                                                                               |
| 12b                                 | 1.96-2.09 (1H, m)                  |                  | H-12a                               | -                                                      | H-2b                                                                               |
| 13                                  | -                                  | 74.7             | -                                   | -                                                      | -                                                                                  |
| 14                                  | 4.83 (1H, d, <i>J</i> =5.1 Hz)     | 79.1             | H-9                                 | C-8; C-13; C-16; 14-OCOPh                              | H-9; H-12a                                                                         |
| 15                                  | 4.59 (1H, d, <i>J</i> =4.7 Hz)     | 77.5             | H-16                                | C-8; C-16                                              | 8-OCH <sub>2</sub> CH <sub>3</sub> ; 8-OCH <sub>2</sub> CH <sub>3</sub> ; H-2', 6' |
| 16                                  | 3.48-3.50 (1H, m)                  | 92.4             | H-15                                | -                                                      | -                                                                                  |
| 17                                  | 3.25-3.30 (1H, m)                  | 65.6             | -                                   | -                                                      | -                                                                                  |
| 18a                                 | 3.55 (1H, d, <i>J</i> =8.0 Hz)     | 78.5             | H-18b                               | C-3; C-4; C-19                                         | H-18b                                                                              |
| 18b                                 | 3.11 (1H, d, <i>J</i> =8.0 Hz)     |                  | H-18a                               | C-3; C-4; C-5; 18-OMe                                  | H-18a                                                                              |
| 19a                                 | 3.13-3.19 (1H, m)                  | 57.9             | -                                   | -                                                      | -                                                                                  |
| 19b                                 | 3.02-3.09 (1H, m)                  |                  | -                                   | -                                                      | -                                                                                  |
| NCH <sub>3</sub>                    | 2.97 (3H, s)                       | 43.0             | -                                   | -                                                      | -                                                                                  |
| 1-OMe                               | 3.35 (3H, s)                       | 56.2             | -                                   | C-1                                                    | -                                                                                  |
| 6-OMe                               | 3.28 (3H, s)                       | 59.0             | -                                   | C-6                                                    | H-6                                                                                |
| 8-OCH <sub>2</sub> CH <sub>3</sub>  | 3.38-3.50 (2H, m)                  | 57.6             | 8-OCH <sub>2</sub> CH <sub>3</sub>  | 8-OCH <sub>2</sub> CH <sub>3</sub>                     | H-7; H-15; 8-OCH <sub>2</sub> CH <sub>3</sub>                                      |
| 8-OCH <sub>2</sub> CH <sub>3</sub>  | 0.56 (3H, t, <i>J</i> =6.9 Hz)     | 15.3             | 8-OCH <sub>2</sub> CH <sub>3</sub>  | 8-OCH <sub>2</sub> CH <sub>3</sub>                     | H-15; 8-OCH <sub>2</sub> CH <sub>3</sub>                                           |
| 16-OMe                              | 3.82 (3H, s)                       | 62.0             | -                                   | C-16                                                   | -                                                                                  |
| 18-OMe                              | 3.32 (3H, s)                       | 59.3             | -                                   | C-18                                                   | H-5                                                                                |
| 14-OCOC <sub>6</sub> H <sub>5</sub> | -                                  | 166.3            | -                                   | -                                                      | -                                                                                  |
| 1'                                  | -                                  | 130.1            | -                                   | -                                                      | -                                                                                  |
| 2'                                  | 8.05 (1H, d, <i>J</i> =7.7 Hz)     | 129.8            | H-3', H-5'                          | 14-OCOC <sub>6</sub> H <sub>5</sub> ; C-4'; C-2'; H-6' | H-15; H-3'; H-5'                                                                   |
| 3'                                  | 7.45 (1H, t, <i>J</i> =7.6 Hz)     | 128.6            | H-2'; H-6'; H-4'                    | C-2'; C-6'                                             | H-2'; H-6'                                                                         |
| 4'                                  | 7.56 (1H, t, <i>J</i> =7.4 Hz)     | 133.2            | H-3'; H-5'                          | C-2' C-6'                                              | -                                                                                  |
| 5'                                  | 7.45 (1H, t, <i>J</i> =7.6 Hz)     | 128.6            | H-2'; H-6'; H-4'                    | C-2'; C-6'                                             | H-2'; H-6'                                                                         |
| 6'                                  | 8.05 (1H, d, <i>J</i> =7.7 Hz)     | 129.8            | H-3'; H-5'                          | 14-OCOC <sub>6</sub> H <sub>5</sub> ; C-4'; C-2'; C-6' | H-15; H-3'; H-5'                                                                   |

NMR spectra were acquired on a Bruker Avance III HD 600 MHz spectrometer.

**Table S2** The 1D and 2D NMR data of compound **37** in CDCl<sub>3</sub>

| No.              | $\delta_H$ (ppm) ( <i>J</i> in Hz)     | $\delta_C$ (ppm) | HMBC                                         | <sup>1</sup> H- <sup>1</sup> H COSY | NOESY            |
|------------------|----------------------------------------|------------------|----------------------------------------------|-------------------------------------|------------------|
| 1                | 2.96 (1H, dd, <i>J</i> = 10.2, 6.2 Hz) | 86.3             | 1-OMe, C-10, C-11, C-17                      | H-2a, H-2b                          | H-10             |
| 2a               | 2.10-2.17 (1H, m)                      | 25.8             | -                                            | H-1, H-2b                           | H-2b             |
| 2b               | 1.85-1.94 (1H, m)                      | -                | -                                            | H-1, H-2a                           | H-2a             |
| 3a               | 1.61-1.70 (1H, m)                      | 34.7             | -                                            | H-3b                                | H-3b             |
| 3b               | 1.48-1.57 (1H, m)                      | -                | -                                            | H-2a, H-3a                          | H-3a             |
| 4                | -                                      | 39.8             | -                                            | -                                   | -                |
| 5                | 2.04-2.06 (1H, m)                      | 48.8             | C-7, C-10, C-11, C-17, C-18, C-19            | H-6                                 | H-16             |
| 6                | 3.87-3.90 (1H, m)                      | 84.2             | 6-OMe, C-4, C-8                              | H-5                                 | H-9              |
| 7                | 2.83 (1H, d, <i>J</i> = 5.7 Hz)        | 40.8             | C-6, C-9, C-17                               | -                                   | -                |
| 8                | 2.79-2.80 (1H, m)                      | 48.9             | C-7, C-9, C-10, C-15, C-17                   | H-9                                 | H-16, H-9        |
| 9                | 2.50 (1H, q, <i>J</i> = 5.6 Hz)        | 40.8             | C-12, C-13, C-14, C-15                       | H-14, H-8, H-10                     | H-6, H-8, H-14   |
| 10               | 2.06-2.11 (1H, m)                      | 45.3             | -                                            | H-9, H-12a, H-12b                   | H-1, H-14        |
| 11               | -                                      | 51.4             | -                                            | -                                   | -                |
| 12a              | 2.74-2.78 (1H, m)                      | 33.4             | C-11, C-13, C-14, C-16                       | H-10                                | H-12b            |
| 12b              | 1.69-1.74 (1H, m)                      | -                | C-10, C-13                                   | H-10                                | H-12a            |
| 13               | -                                      | 78.6             | -                                            | -                                   | -                |
| 14               | 4.24 (1H, d, <i>J</i> = 5.0 Hz)        | 76.6             | C-8, C-13, C-16                              | H-9                                 | H-9, H-10        |
| 15               | -                                      | 212.4            | -                                            | -                                   | -                |
| 16               | 3.89-3.92 (1H, m)                      | 86.0             | 16-OMe, C-12, C-13, C-15                     | -                                   | H-5, H-8         |
| 17               | 2.89(1H, s)                            | 63.6             | C-6, C-8, C-10, C-11, C-19, NCH <sub>3</sub> | -                                   | NCH <sub>3</sub> |
| 18a              | 3.67 (1H, d, <i>J</i> = 8.4 Hz)        | 80.4             | 18-OMe, C-3, C-4, C-19                       | H-18b                               | H-18b            |
| 18b              | 3.21(1H, d, <i>J</i> = 8.4 Hz)         | -                | 18-OMe, C-3, C-4, C-5                        | H-18a                               | H-18a            |
| 19a              | 2.72 (1H, d, <i>J</i> = 10.8 Hz)       | 56.6             | C-3, C-7, C-18                               | H-19b                               | H-19b            |
| 19b              | 2.43(1H, d, <i>J</i> = 10.8 Hz)        | -                | C-17                                         | H-19a                               | H-19a            |
| NCH <sub>3</sub> | 2.32 (3H, s)                           | 42.4             | C-17, C-19                                   | -                                   | H-17             |
| 1-OMe            | 3.23(3H, s)                            | 56.6             | C-1                                          | -                                   | -                |
| 6-OMe            | 3.27 (3H, s)                           | 58.0             | C-6                                          | -                                   | -                |
| 16-OMe           | 3.74 (3H, s)                           | 62.2             | C-16                                         | -                                   | -                |
| 18-OMe           | 3.28 (3H, s)                           | 59.4             | C-18                                         | -                                   | -                |

NMR spectra were acquired on a Bruker Avance III HD 600 MHz spectrometer.

**Table S3** Top 21 target genes with degree values not less than 45

| Target genes | Name                                                                           | Degree value |
|--------------|--------------------------------------------------------------------------------|--------------|
| AKT1         | RAC-alpha serine/threonine-protein kinase                                      | 100          |
| VEGFA        | Vascular endothelial growth factor A                                           | 82           |
| EGFR         | Epidermal growth factor receptor                                               | 81           |
| STAT3        | Signal transducer and activator of transcription 3                             | 73           |
| SRC          | Proto-oncogene tyrosine-protein kinase Src                                     | 73           |
| ESR1         | Estrogen receptor                                                              | 72           |
| TNF          | Tumor necrosis factor                                                          | 71           |
| MAPK1        | Mitogen-activated protein kinase 1                                             | 68           |
| JUN          | Transcription factor AP-1                                                      | 67           |
| HSP90AA1     | Heat shock protein HSP 90-alpha                                                | 66           |
| MTOR         | Serine/threonine-protein kinase mTOR                                           | 65           |
| CXCL8        | Interleukin-8                                                                  | 64           |
| PTGS2        | Prostaglandin G/H synthase 2                                                   | 56           |
| AR           | Androgen receptor                                                              | 48           |
| PIK3CA       | Phosphatidylinositol 4,5-bisphosphate 3-kinase catalytic subunit alpha isoform | 48           |
| MAPK14       | Mitogen-activated protein kinase 14                                            | 46           |
| NFKB1        | Nuclear factor NF-kappa-B p105 subunit                                         | 46           |
| IL2          | Interleukin-2                                                                  | 46           |
| HIF1A        | Hypoxia-inducible factor 1-alpha                                               | 46           |
| ATM          | Serine-protein kinase ATM                                                      | 45           |
| KDR          | Vascular endothelial growth factor receptor 2                                  | 45           |

**Table S4** Enrichment analysis results of 173 target genes

| SampleGroup             | GeneRatio | Qvalue | Count | Description                | Target genes                                                                                                                                                                                                                                                                                                                                                                                                                                                                                                                                                                                                                                                                                                                                                                  |
|-------------------------|-----------|--------|-------|----------------------------|-------------------------------------------------------------------------------------------------------------------------------------------------------------------------------------------------------------------------------------------------------------------------------------------------------------------------------------------------------------------------------------------------------------------------------------------------------------------------------------------------------------------------------------------------------------------------------------------------------------------------------------------------------------------------------------------------------------------------------------------------------------------------------|
| KEGG Pathway            | 44/576    | -34.63 | 44    | Pathways in cancer         | AKT1, ALK, BIRC2, XIAP, AR, BCL2L1, EGFR, EPAS1, ESR1, ESR2, FGF2, FLT3, MTOR, GNAS, GSK3B, HDAC1, HDAC2, HIF1A, HSP90AA1, IKBKB, IL2, CXCL8, JUN, SMAD3, MMP2, NFKB1, NOS2, PDGFRA, PIK3CA, PIK3CB, PIM1, PIK3CD, PPARG, PRKCA, PRKCB, MAPK1, PTGS2, RAF1, SLC2A1, STAT3, TERT, TGFB1, VEGFA, NCOA3, ATM, CYP24A1, DNMT1, MCL1, ABCC1, ABCB1, MAPK7                                                                                                                                                                                                                                                                                                                                                                                                                          |
| Reactome Gene Sets      | 38/461    | -30.97 | 38    | Signaling by Interleukins  | AKT1, BCL2L1, CA1, CCR1, MAPK14, PTK2B, FGF2, HIF1A, HSP90AA1, IKBKB, IL2, CXCL8, JUN, LCK, LGALS9, SMAD3, MAOA, MCL1, MMP2, MTAP, NFKB1, NOS2, OPRM1, PIK3CA, PIK3CB, PIM1, PIK3CD, MAPK1, MAPK7, PTAFR, PTGS2, RORA, RORC, STAT3, SYK, TNF, VEGFA, CCR2, BIRC2, EIF4A1, FLT3, PIN1, PRKCD, PTPN1                                                                                                                                                                                                                                                                                                                                                                                                                                                                            |
| GO Biological Processes | 44/740    | -30.00 | 44    | regulation of MAPK cascade | ADRA1A, ADRA2B, AKT1, ALK, AR, CASR, CDK1, CCR1, MAPK14, DRD2, EGFR, ELANE, PTK2B, FGF2, FLT3, GPER1, IGFBP3, IGFBP4, KDR, LGALS9, OPRM1, PAK1, PDGFRA, PIK3CB, PIK3CG, PIN1, PLA2G1B, PLA2G2A, PRKCA, PRKCD, MAPK1, PTPN1, RAF1, REN, RGS4, SRC, SYK, TGFB1, TNF, VEGFA, HDAC3, TLR9, HRH4, GPBAR1, ACE, MTOR, HSP90AA1, IL2, MAPT, PDPK1, PIK3CA, PLK1, STK11, MERTK, IKBKB, NFKB1                                                                                                                                                                                                                                                                                                                                                                                          |
| WikiPathways            | 23/114    | -27.86 | 23    | Gastrin Signaling Pathway  | AKT1, BIRC2, BCL2L1, MAPK14, EGFR, MTOR, GSK3B, IKBKB, IL2, CXCL8, JUN, NFKB1, PAK1, PIK3CA, PPARG, PRKCA, PRKCD, MAPK1, PTGS2, RAF1, SRC, STAT3, VEGFA, FGF2, KDR, PDGFRA, PDPK1, PIK3CB, PIK3CD, PRKCB, MYLK, PIK3CG, PLA2G2A, MAPK7, TNF, CCR1, PTK2B, GNAS, NCOA3, SMAD3, MMP2, PIM1, TGFB1, CYP2D6, ESR1, ESR2, GPER1, HIF1A, SYK, ACE, NOS2, TLR9, HDAC1, HDAC2, SLC2A1, HDAC3, HSP90AA1, OPRM1, PGR, CXCR1, CCR2, PPARA, PTPN1, NR1H2, NR1H3, XBP1, NOS1, ERG, IGFBP3, FLT3, LCK, MCL1, STK11, EPAS1, PPP5C, XIAP, ATM, ATR, TERT, CDK1, KCNA5, G6PD, CYP19A1, AR, SLC22A1, CYP17A1, PLA2G1B, PARP1, DRD2, MERTK, CYP3A4, CNR1, PLK1, BTK, ALK, PIN1, ALDH1A1, NR5A2, PLG, ABCC1, PTGS1, GHSR, PDE10A, PTAFR, ABCB1, IGFBP1, HSD11B2, ACHE, CHRM3, CHRNA4, MAPT, AURKA |
| GO Biological Processes | 41/701    | -27.59 | 41    | response to wounding       | ADRA2B, KLF5, CCR1, DRD2, EGFR, FAP, FGF2, MTOR, GNAS, HDAC1, HDAC2, HIF1A, IGFBP1, KDR, LCK, LGALS1, SMAD3, MYLK, OPRM1, PAK1, PDGFRA, PDPK1, PIK3CA, PIK3CB, PIK3CG, PLG, PPARA, PRKCA, PRKCB, PRKCD, MAPK1, RAF1, SRC, AURKA, SYK, TGFB1, TNF, VEGFA, XBP1, MERTK, CCR2, CHRM3, HSD11B2, OPRK1, SLC6A3, UGCG, NR1H2, NR1H3, AKT1, MAPK14, KIF11, NOS1, NOS2, PTPN1, PDE5A, PDE10A                                                                                                                                                                                                                                                                                                                                                                                          |
| GO Biological Processes | 37/565    | -26.54 | 37    | cellular response to       | PARP1, AKT1, AR, ATM, CASR, MAPK14, CYP24A1, EGFR, ESR1, ESR2, PTK2B, FLT3, GHSR, GPER1, NR3C1,                                                                                                                                                                                                                                                                                                                                                                                                                                                                                                                                                                                                                                                                               |

|                         |        |        |    |                                                    |                                                                                                                                                                                                                                                                                                                                                                                                                                                                      |
|-------------------------|--------|--------|----|----------------------------------------------------|----------------------------------------------------------------------------------------------------------------------------------------------------------------------------------------------------------------------------------------------------------------------------------------------------------------------------------------------------------------------------------------------------------------------------------------------------------------------|
|                         |        |        |    | lipid                                              | HDAC1, HDAC2, CXCL8, NFKB1, NOS2, PAK1, PGR, PIM1, PPARA, PPARG, PPP5C, PRKCA, MAPK1, PTAFR, RORA, RORC, SRC, TNF, XBP1, NCOA3, NR1H3, GPBAR1, KLF5, LGALS1, OPRM1, PIK3CG, AGL, HSD11B2, NR5A2, REN                                                                                                                                                                                                                                                                 |
| GO Biological Processes | 35/538 | -24.97 | 35 | regulation of hormone levels                       | ACHE, ADRA2B, ALDH1A1, BTK, CASR, CNR1, CYP1A2, CYP2C9, CYP2D6, CYP3A4, CYP17A1, CYP19A1, ACE, DPP4, DRD2, EGFR, ESR1, GHSR, GNAS, GPER1, HIF1A, HSD11B2, HSD17B1, KCNA5, MME, NFKB1, NOS2, PDGFRA, PRKCA, RAF1, REN, SLC2A1, SLC22A1, TNF, TARDBP, STS, CYP2C19, CYP24A1, NR5A2, G6PD, RORA, RORC, SOAT1, NR1I2, PPARA, SLC10A2, SLCO1B1, SLCO1B3, PTGS2                                                                                                            |
| WikiPathways            | 29/317 | -24.81 | 29 | Nuclear Receptors Meta-Pathway                     | BIRC2, CDK1, CYP1A2, CYP2C19, CYP2C9, CYP3A4, EGFR, ESR1, G6PD, NR3C1, HSP90AA1, IGFBP1, IL2, JUN, ABCB1, PPARA, PTGS2, SLC2A1, SLC5A1, SLC5A2, SLC6A2, SLC6A3, SRC, STAT3, TNF, NCOA3, NR1I2, NR1H3, SLCO1B1                                                                                                                                                                                                                                                        |
| GO Biological Processes | 36/597 | -24.57 | 36 | positive regulation of cellular component movement | AKT1, ATM, CCR1, MAPK14, EGFR, ELANE, PTK2B, FGF2, MTOR, GPER1, HIF1A, CXCL8, KDR, LGALS3, LGALS9, SMAD3, MYLK, PAK1, PDGFRA, PDPK1, PIK3CB, PIK3CD, PIK3CG, PRKCA, MAPK1, PTAFR, PTGS2, SRC, STAT3, STK11, TERT, TGFBR1, TNF, VEGFA, XBP1, CCR2, CASR, KLF5, DNMT1, EPAS1, FAP, GHSR, JUN, MMP2, PIK3CA, PPARG, PRKCB, MAPK7, RORA, SYK, ALK, AR, FLT3, GSK3B, HSP90AA1, IGFBP1, IGFBP3, IGFBP4, LCK, PRKCD, PTPN1, RAF1, MERTK, ESR1, PGR, PLG, TLR9, GPBAR1, DPP4 |
| WikiPathways            | 18/66  | -24.47 | 18 | AGE/RAGE pathway                                   | AKT1, MAPK14, EGFR, HIF1A, IKBKB, JUN, LGALS3, SMAD3, MMP2, NFKB1, NOS2, PRKCA, PRKCB, PRKCD, MAPK1, RAF1, SRC, STAT3, PARP1, ATM, ATR, CDK1, DYRK1A, MTOR, GSK3B, HSP90AA1, NOS1, PAK1, PDPK1, PIK3CA, PLK1, MAPK7, AURKA, SYK, TGFBR1, TNF, VEGFA, PTK2B, NCOA3, CNR1, MAPT, BTK, LCK, PIK3CG, FGF2, FLT3, KDR, PDGFRA, PPP5C, GNAS, IL2, CXCL8, OPRM1, CYP19A1, PIN1, PPARG, BCL2L1, PIM1, AR, MYLK, HDAC1, TERT, PTGS2                                           |
| GO Biological Processes | 36/623 | -23.93 | 36 | regulation of secretion                            | ACHE, ADRA1A, ADRA2B, CASR, CHRNA4, CNR1, CYP19A1, DPP4, DRD2, EGFR, GHSR, GNAS, GPER1, GSK3B, HIF1A, KCNA5, LGALS9, NOS2, OPRK1, OPRM1, PDPK1, PLA2G1B, PRKCA, PRKCB, PTAFR, REN, SLC2A1, SYK, TNF, NR1H2, XBP1, PTGES, NR1H3, TARDBP, BACE1, CCR2, MAPK14, SMAD3, MAPT, PAK1, PRKCD, MAPK1, PTPN1, SRC, HDAC3, BTK, RAF1, SLC22A1                                                                                                                                  |
| GO Biological Processes | 30/385 | -23.62 | 30 | response to oxygen levels                          | AKT1, BIRC2, ATM, CA9, CASR, CHRNA4, DPP4, DRD2, EPAS1, PTK2B, MTOR, HDAC2, HIF1A, HSD11B2, KCNA5, SMAD3, MMP2, NOS1, NOS2, PAK1, PIN1, PPARA, PPARG, PTGS2, RAF1, RORA, SLC2A1, SRC, TERT, VEGFA, IGFBP1, JUN, MCL1, ABCB1, BCL2L1, IGFBP3                                                                                                                                                                                                                          |
| GO Biological Processes | 35/597 | -23.46 | 35 | regulation of system process                       | PARP1, ADRA1A, ADRA2B, AKT1, CASR, CHRM3, ACE, DRD2, EGFR, EPAS1, PTK2B, MTOR, G6PD, GHSR, GLRA1, GNAS, GPER1, GPR35, IL2, KCNA5, SMAD3, NOS1, OPRK1, OPRM1, PAK1, PIK3CG, PIN1, PPARA,                                                                                                                                                                                                                                                                              |



|                         |        |        |    |                                                      |                                                                                                                                                                                                                                                                                                                                                                                                                                                                                                                                      |
|-------------------------|--------|--------|----|------------------------------------------------------|--------------------------------------------------------------------------------------------------------------------------------------------------------------------------------------------------------------------------------------------------------------------------------------------------------------------------------------------------------------------------------------------------------------------------------------------------------------------------------------------------------------------------------------|
| GO Biological Processes | 36/665 | -22.97 | 36 | cellular response to hormone stimulus                | PRKCA, PTAFR, REN, RGS4, SRC, NR1H2, NR1H3, AR, CNR1, HSD11B2, MME, NOS2, PIK3CA, PPARG, PTGS1, PTGS2, VEGFA, HDAC2, MYLK, GSK3B, MAPT, PRKCD, BTK, MAPK1, MAPK7, HRH4<br>ACHE, PARP1, AKT1, AR, CHRM3, EGFR, ESR1, ESR2, FLT3, NR5A2, GHSR, GPER1, NR3C1, GSK3B, HDAC1, IGFBP1, NFKB1, OPRM1, PAK1, PDPK1, PGR, PIK3CA, PLA2G1B, PPARA, PPARG, PPP5C, PRKCB, PRKCD, PTPN1, REN, SRC, STAT3, UGCG, XBP1, NCOA3, HRH4, KLF5, CASR, MTOR, GLRA1, HDAC2, MMP2, ABCC1, PDGFRA, PIK3CG, MAPK1, PTAFR, TNF, BACE1, MAPK14, HSD11B2, SLC2A1 |
| GO Biological Processes | 29/444 | -20.68 | 29 | second-messenger-mediated signaling                  | ADRA1A, ADRA2B, BTK, CHRM3, CCR1, CNR1, DRD2, EGFR, PTK2B, MTOR, NR5A2, GNAS, GPER1, GSK3B, CXCL8, CXCR1, KDR, MAPT, NOS1, NOS2, OPRM1, PDPK1, PRKCA, MAPK7, SYK, TNF, VEGFA, PDE10A, CCR2                                                                                                                                                                                                                                                                                                                                           |
| GO Biological Processes | 26/331 | -20.54 | 26 | positive regulation of response to external stimulus | BTK, CASR, CCR1, CNR1, EGFR, PTK2B, FGF2, GHSR, IL2, CXCL8, KDR, LGALS9, SMAD3, ABCC1, OPRM1, PIK3CG, PLA2G2A, PLG, PRKCA, MAPK1, PTGS2, STAT3, TNF, VEGFA, TLR9, CCR2, CDK1, LGALS3, NOS1, NOS2                                                                                                                                                                                                                                                                                                                                     |
| GO Biological Processes | 35/736 | -20.49 | 35 | response to growth factor                            | PARP1, AKT1, XIAP, CASR, MAPK14, EGFR, FGF2, FLT3, NR3C1, HDAC2, HIF1A, CXCL8, JUN, KDR, SMAD3, MAPT, NOS1, OPRM1, PDGFRA, PDPK1, PIK3CA, PIK3CB, PIK3CD, PIN1, PPARA, PPARG, PRKCB, MAPK1, MAPK7, PTPN1, RAF1, SRC, STK11, TGFBR1, VEGFA                                                                                                                                                                                                                                                                                            |
| GO Biological Processes | 23/236 | -20.31 | 23 | protein autophosphorylation                          | AKT1, ALK, ATM, ATR, BTK, ACE, DYRK1A, EGFR, PTK2B, FLT3, MTOR, GSK3B, KDR, LCK, PAK1, PDGFRA, PDPK1, PIM1, SRC, AURKA, STK11, SYK, VEGFA, PARP1, BCL2L1, HIF1A, HSP90AA1, LGALS9, MAPT, MCL1, MGMT, OPRM1, PRKCD, MAPK1, MAPK7, PTPN1, TERT, TNF, NR1H2, USP1, XBP1, HDAC3, NR1H3, TLR9, ESR1, JUN, LGALS3, BIRC2, RAF1, SMAD3, PIK3CA, PRKCA, TGFBR1, DNMT1, GPER1, KMT2A, NOS1, PLK1                                                                                                                                              |
| GO Biological Processes | 24/277 | -19.97 | 24 | intracellular receptor signaling pathway             | PARP1, BIRC2, XIAP, AR, CYP24A1, ESR1, ESR2, NR5A2, GPER1, NR3C1, HDAC1, PAK1, PGR, PIM1, PPARA, PPARG, PPP5C, RORA, RORC, SRC, STAT3, NR1H2, NR1I2, NR1H3, DNMT1, HDAC2, AURKA, CDK1, JUN, CYP3A4                                                                                                                                                                                                                                                                                                                                   |
| GO Biological Processes | 30/526 | -19.72 | 30 | leukocyte differentiation                            | PARP1, ATM, BTK, CCR1, MAPK14, PTK2B, FLT3, MTOR, GNAS, IL2, JUN, LCK, LGALS1, LGALS3, LGALS9, PIK3CD, PPARG, PRKCA, RORA, RORC, SRC, STAT3, STK11, SYK, TNF, VEGFA, XBP1, MERTK, TLR9, CCR2, AKT1, DPP4, ELANE, GSK3B, CXCL8, KDR, SMAD3, PAK1, PDPK1, PIK3CA, PIK3CB, PIK3CG, PLG, PPARA, PRKCD, MAPK7, PTAFR, CHRNA4, PRKCB, CNR1, GPER1, PDGFRA, PLA2G2A, NR1H3, DRD2, NR1H2, ACE, MAPK1                                                                                                                                         |

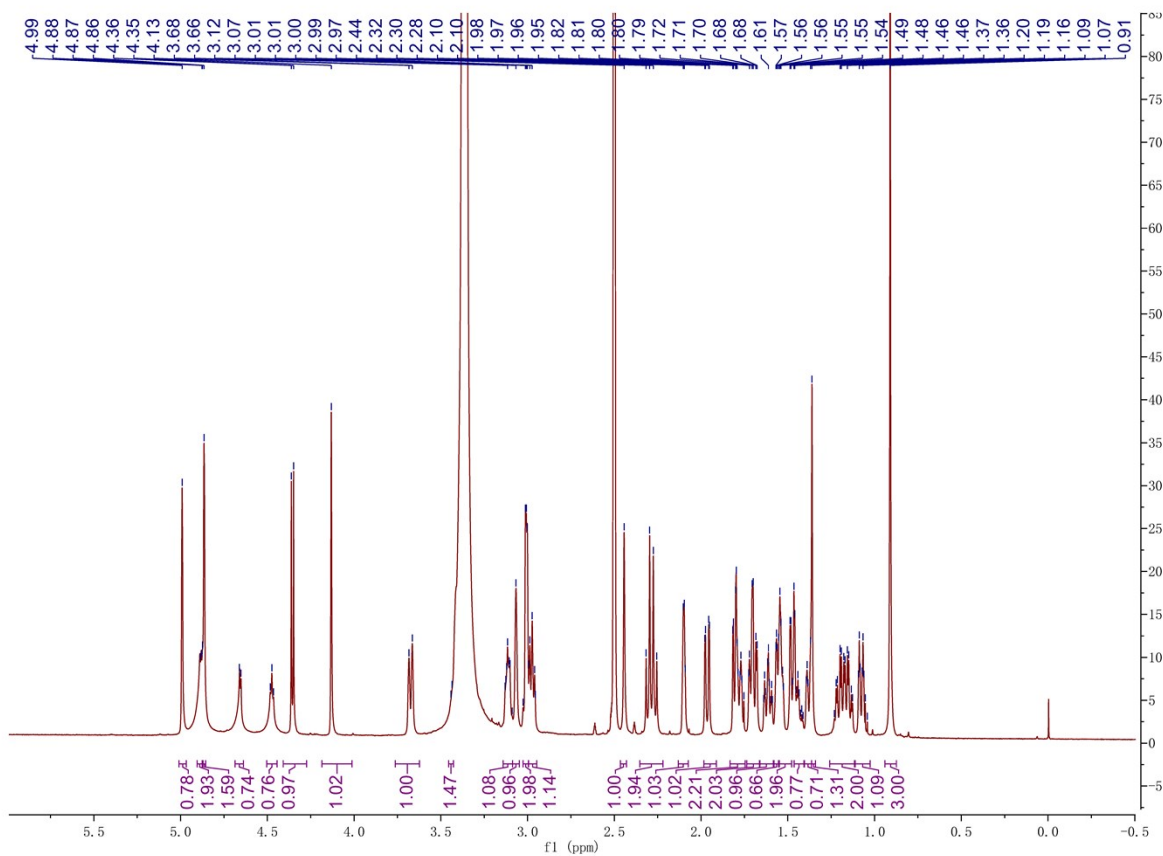

**Figure S1** The  $^1\text{H}$  NMR spectrum of compound **1** in  $\text{DMSO-d}_6$  (500 MHz)

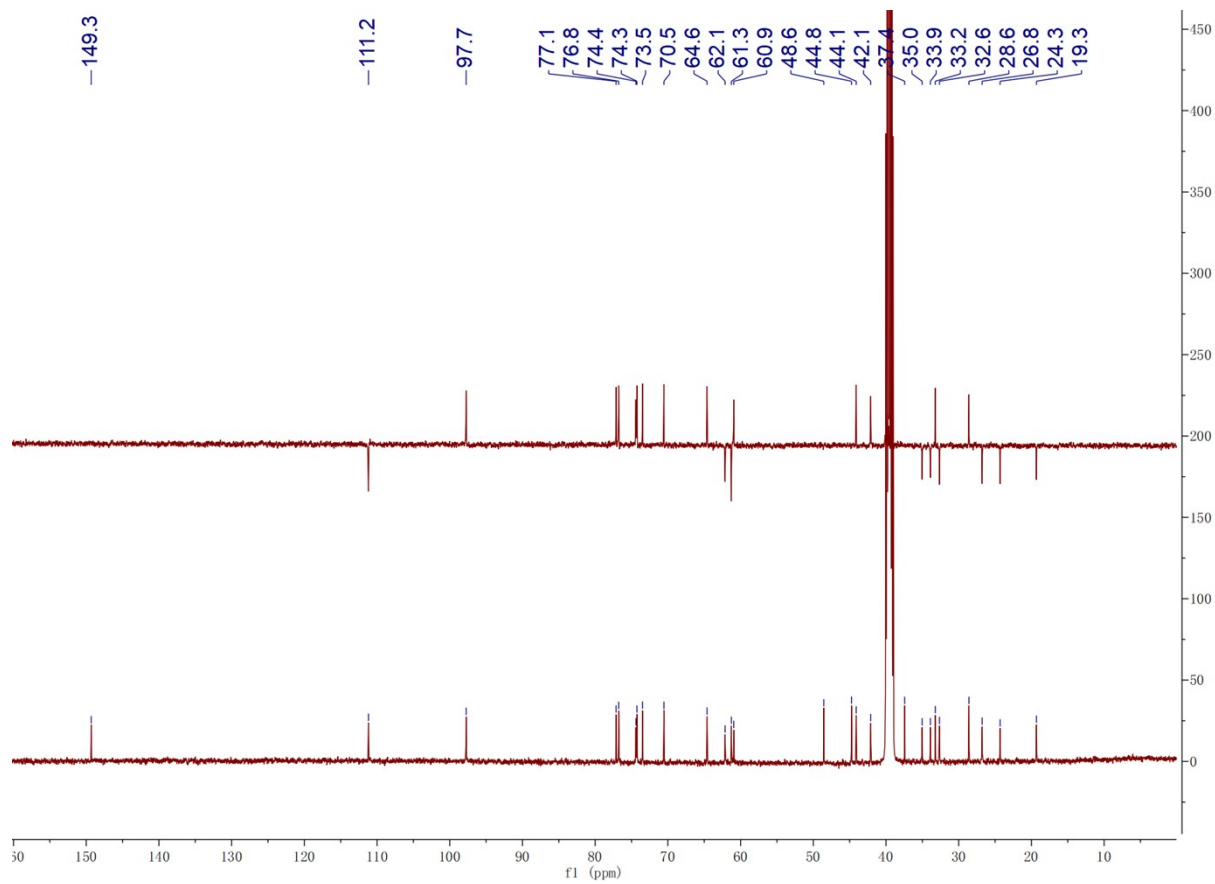

**Figure S2** The  $^{13}\text{C}$  NMR spectrum of compound **1** in  $\text{DMSO-d}_6$  (125 MHz)

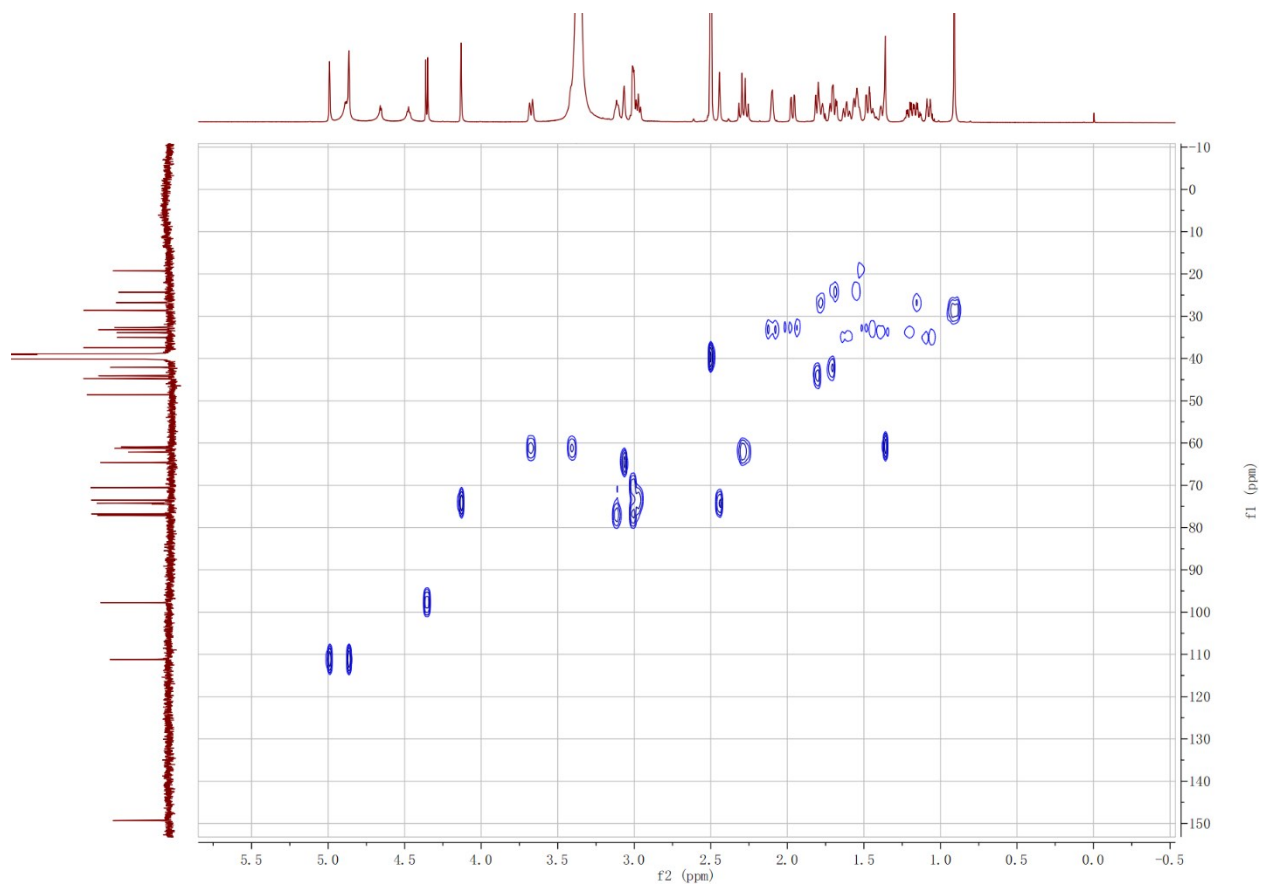

**Figure S3** The HSQC spectrum of compound **1** in  $\text{DMSO-d}_6$

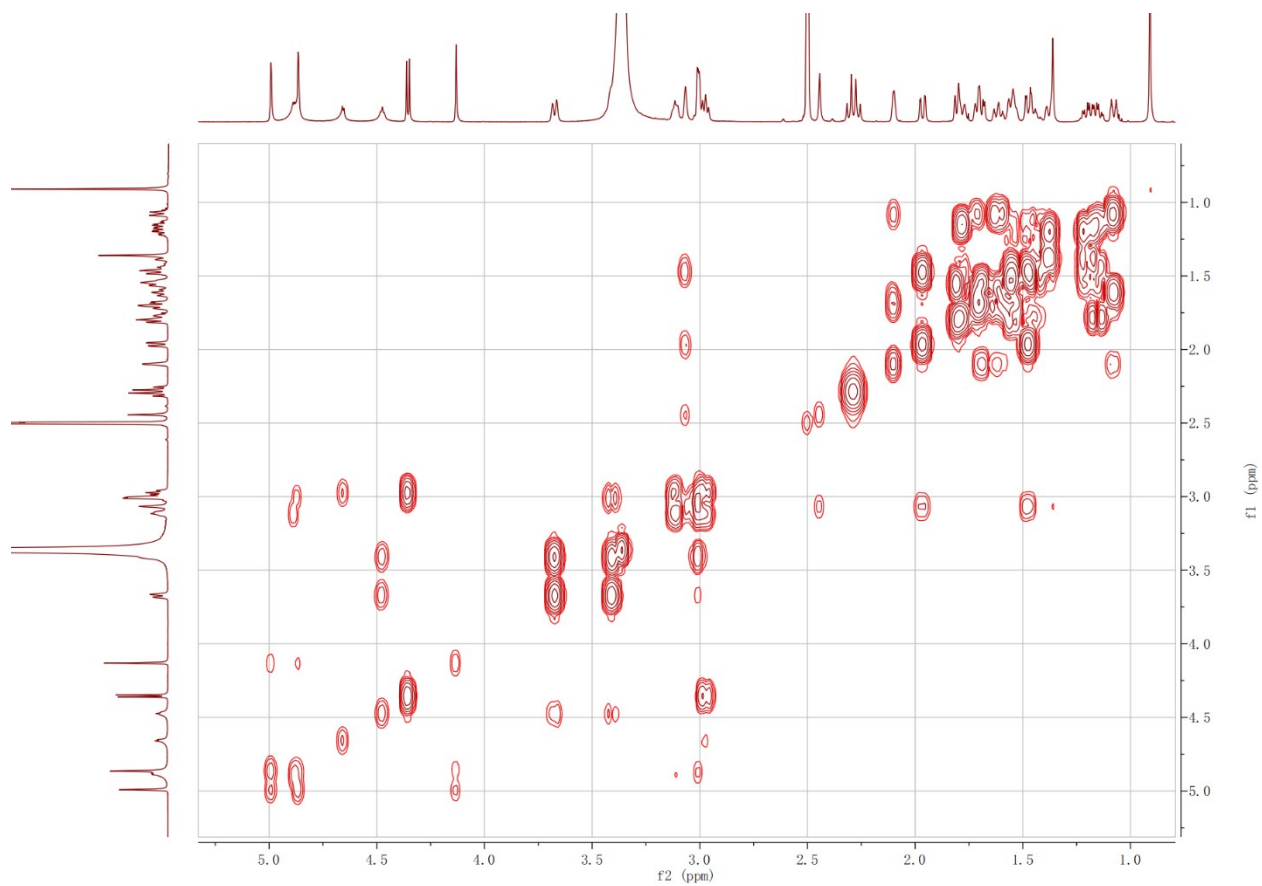

**Figure S4** The  $^1\text{H}$ - $^1\text{H}$  COSY spectrum of compound **1** in  $\text{DMSO-d}_6$

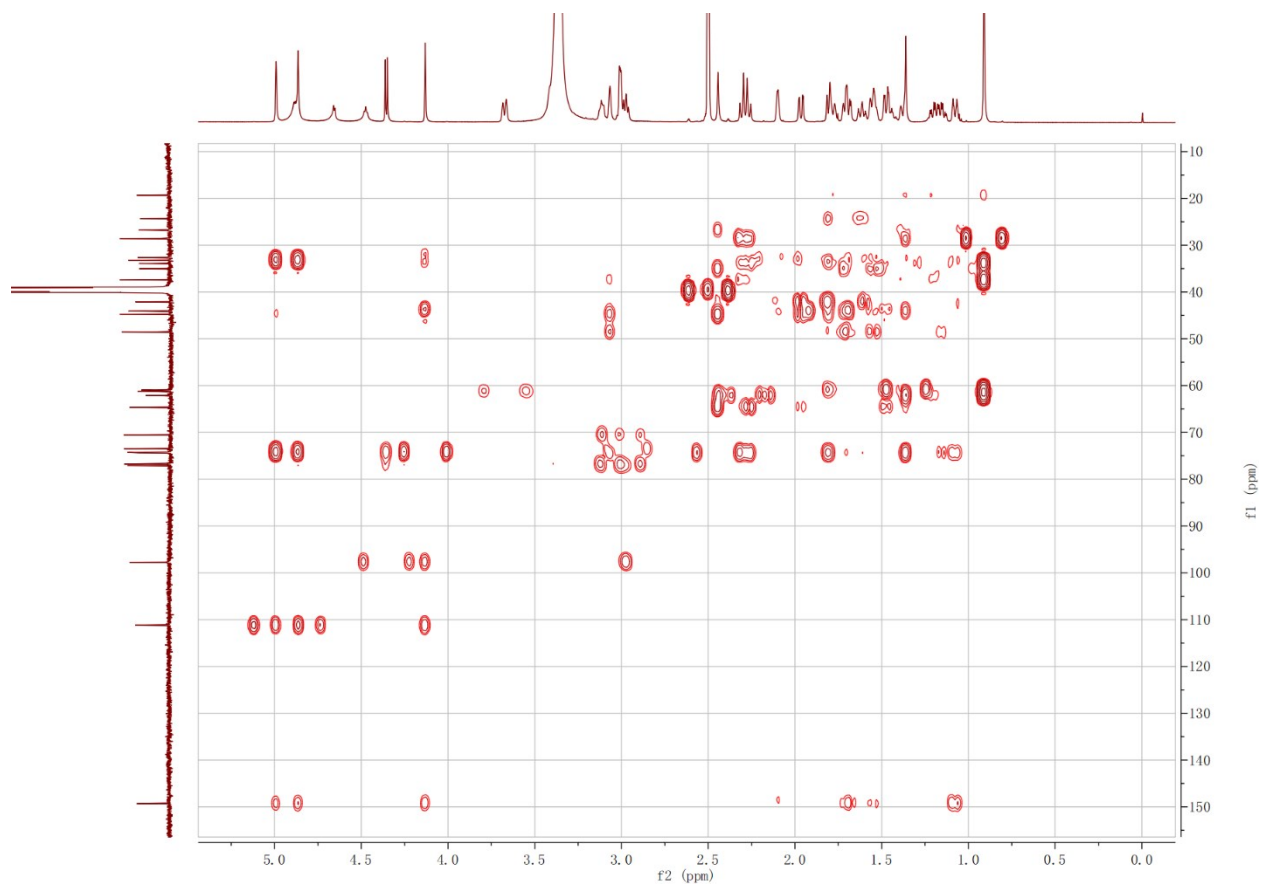

**Figure S5** The HMBC spectrum of compound **1** in DMSO-d<sub>6</sub>

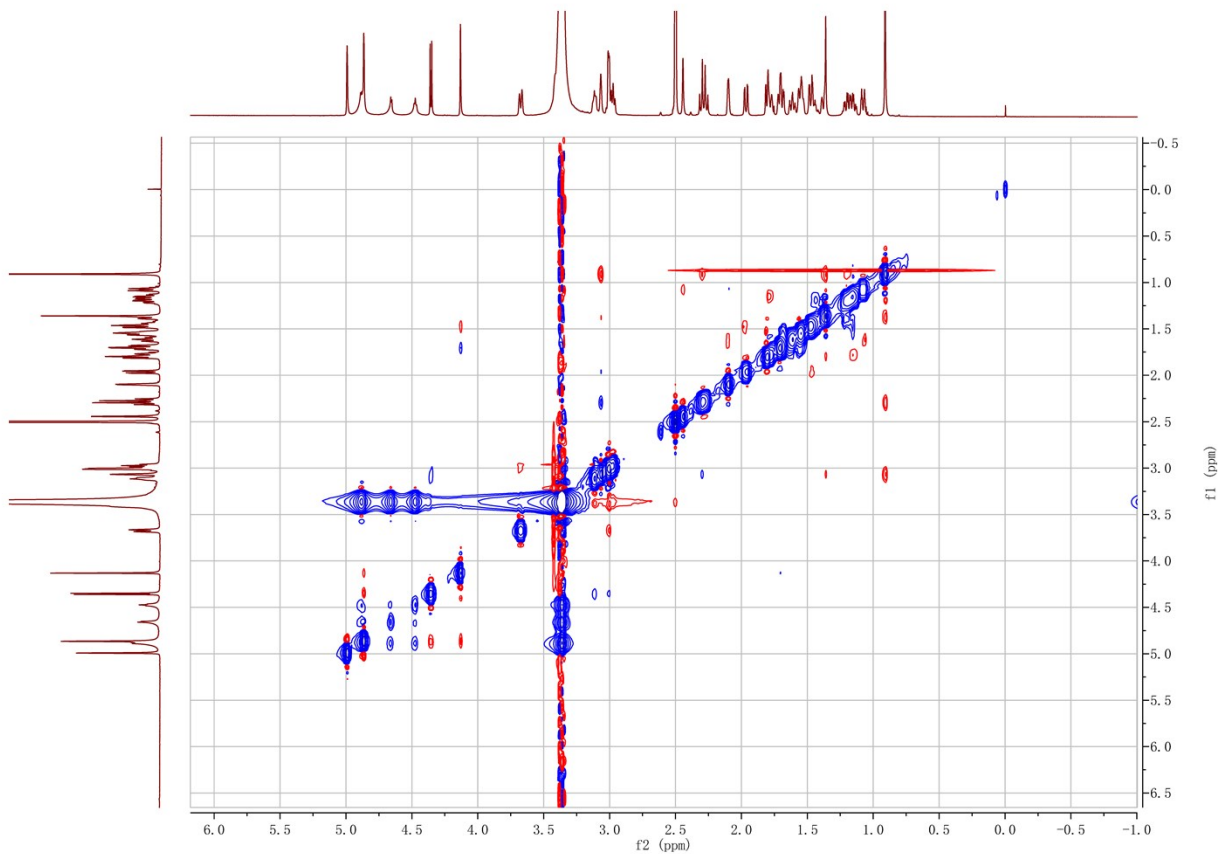

**Figure S6** The NOESY spectrum of compound **1** in DMSO-d<sub>6</sub>

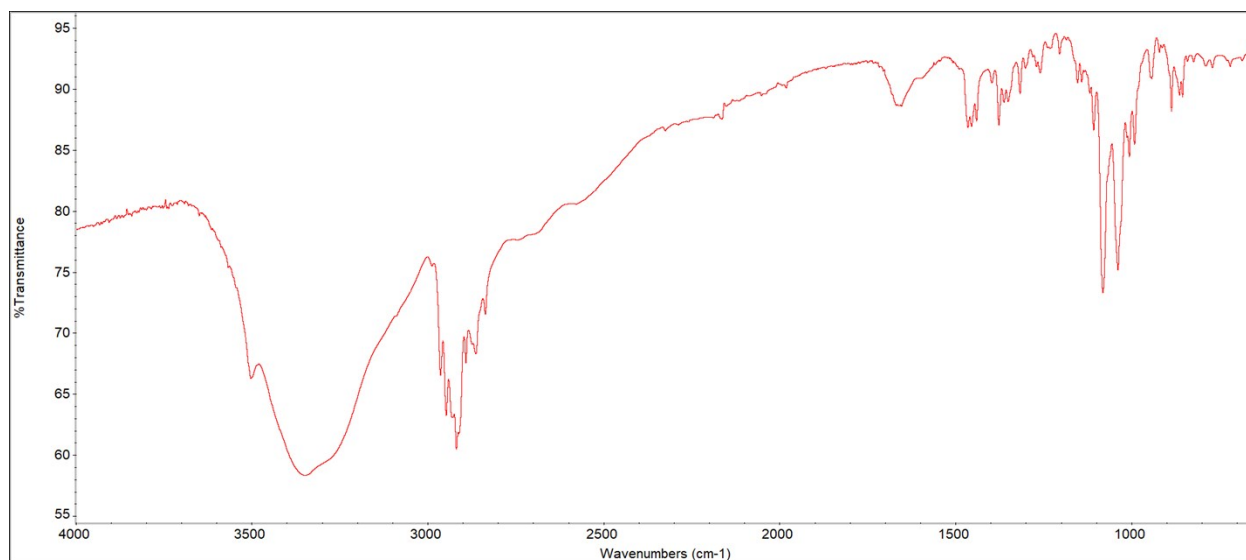

Figure S7 The IR spectrum of compound 1

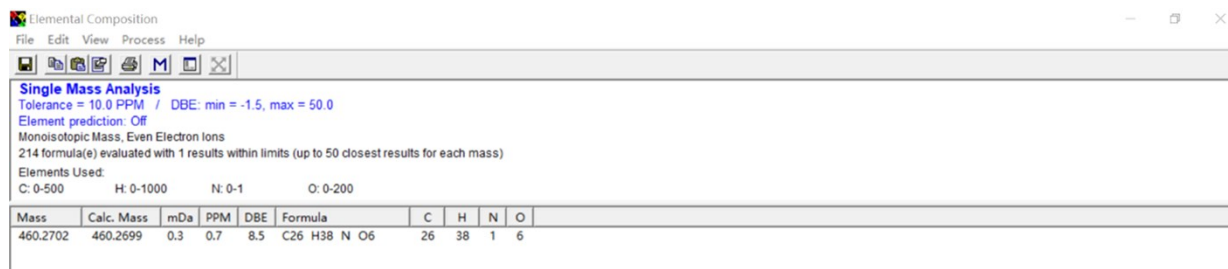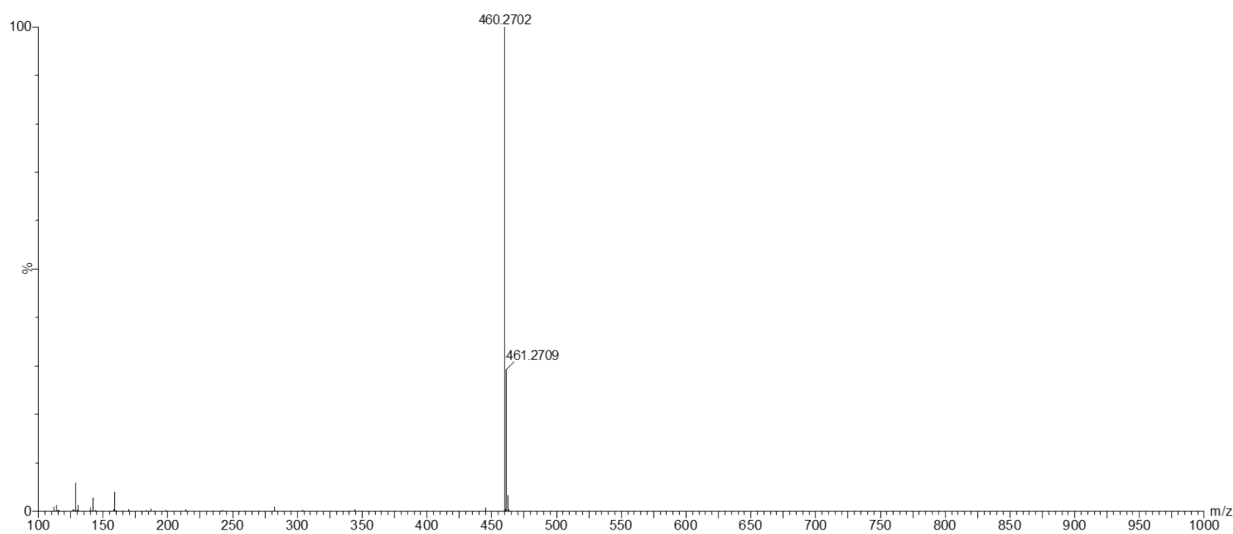

Figure S8 The HR-ESI-MS data of compound 1



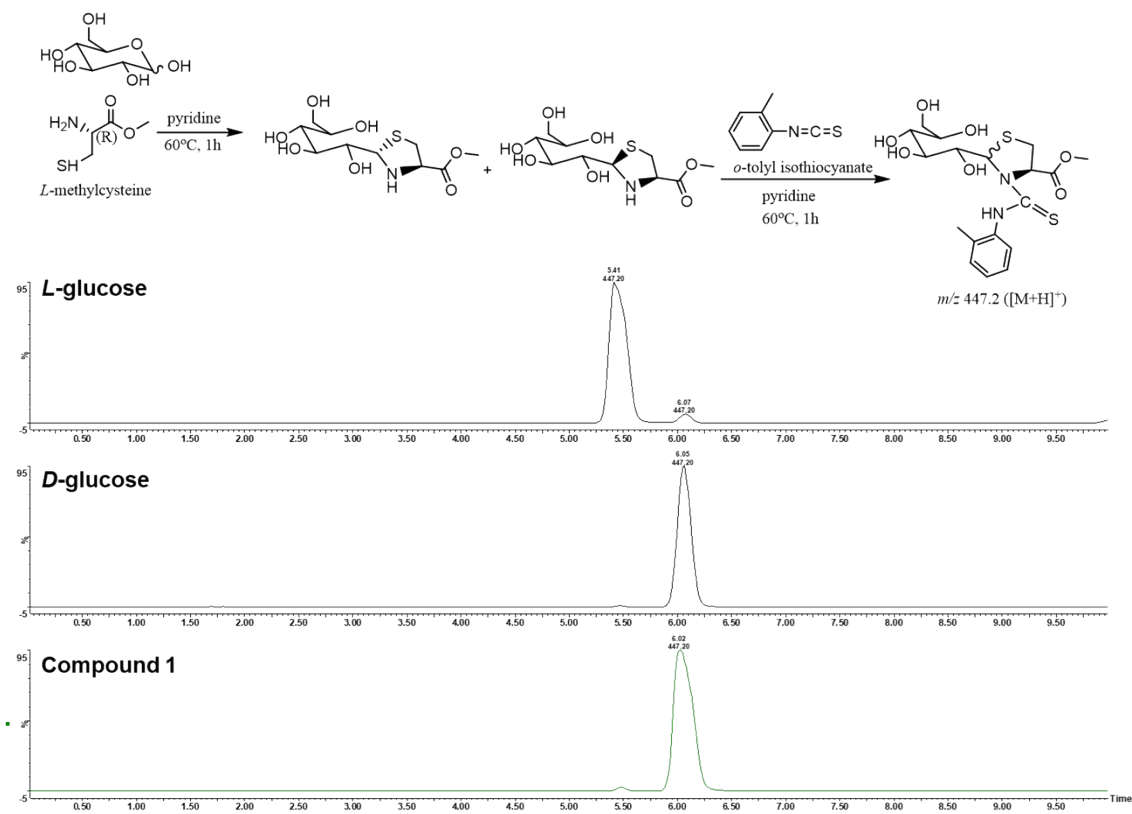

**Figure S9** The UHPLC-MS single ion recording (SIR) chromatograms of  $m/z$  447.2 for sugar configuration confirmation of compound **1**

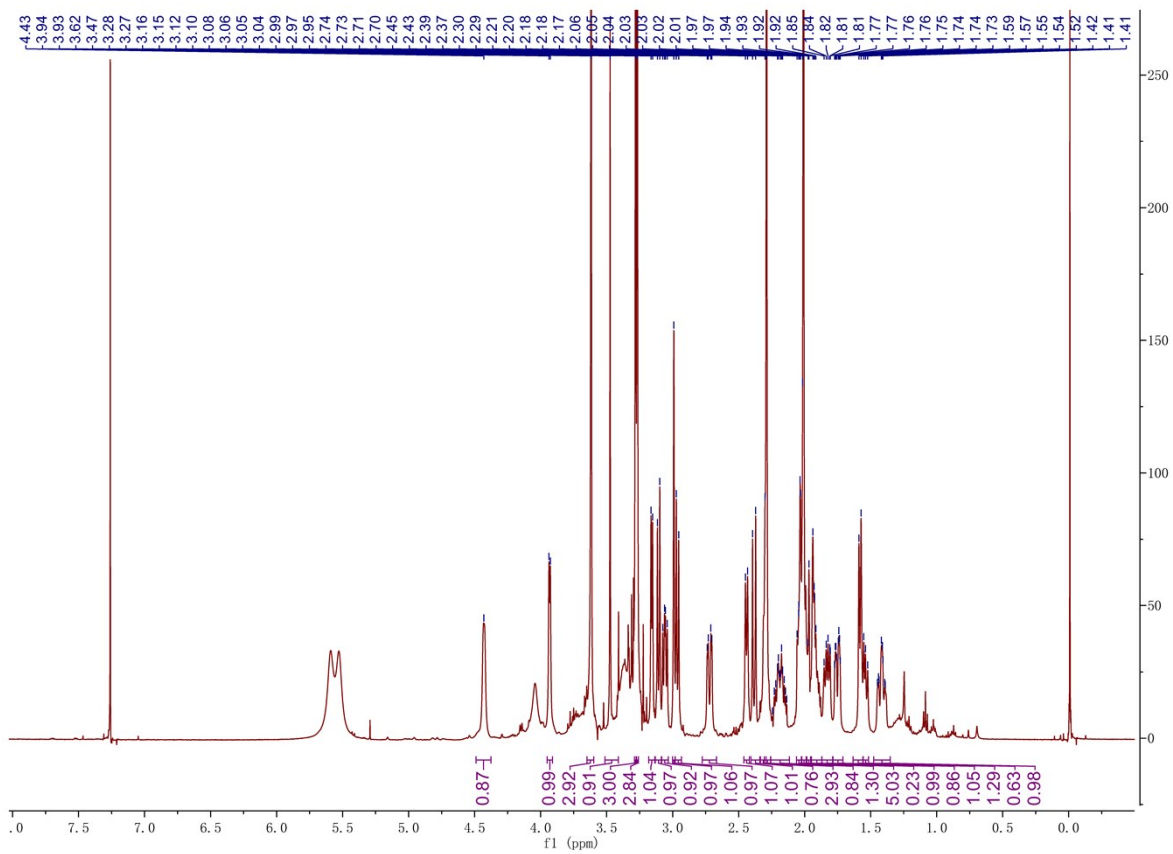

**Figure S10** The  $^1\text{H}$  NMR spectrum of compound **14a** in  $\text{CDCl}_3$  (500 MHz)

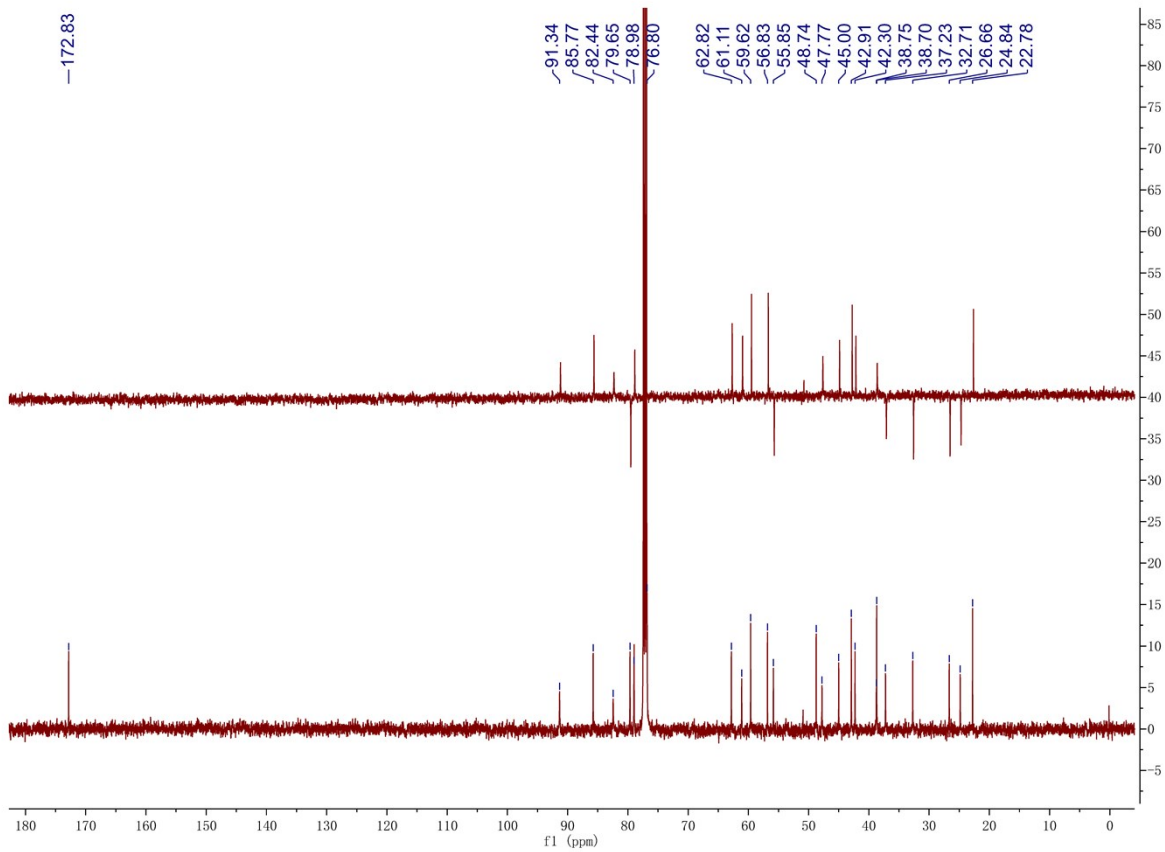

**Figure S11** The  $^{13}\text{C}$  NMR spectrum of compound **14a** in  $\text{CDCl}_3$  (125 MHz)

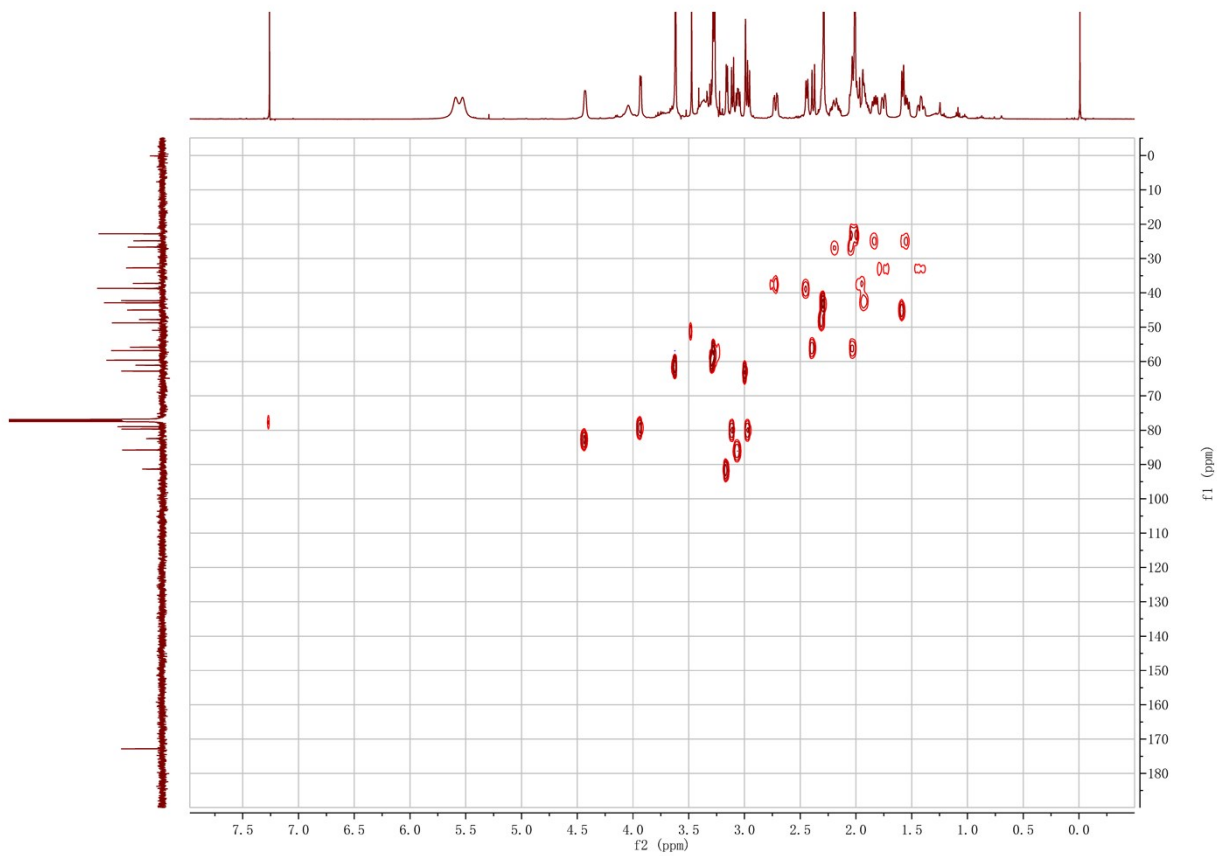

Figure S12 The HSQC spectrum of compound **14a** in  $\text{CDCl}_3$

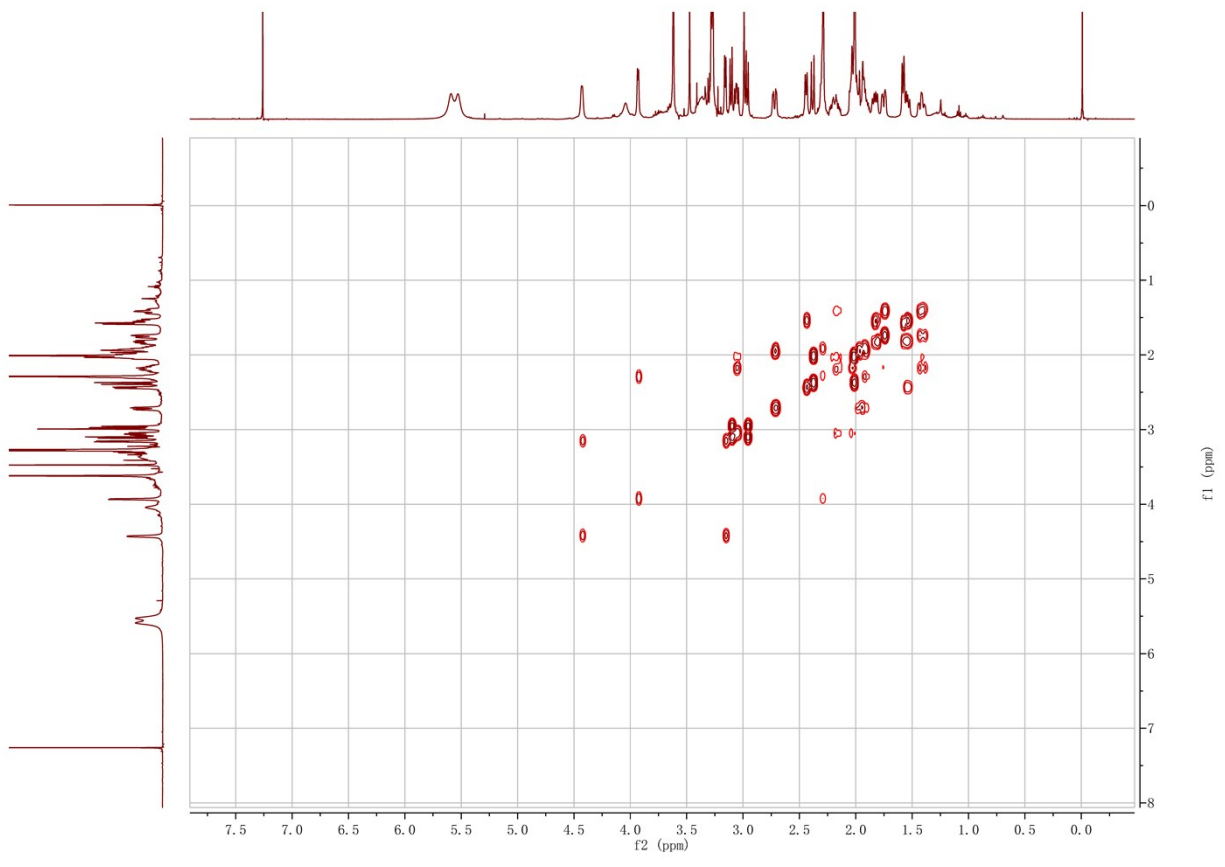

**Figure S13** The  $^1\text{H}$ - $^1\text{H}$  COSY spectrum of compound **14a** in  $\text{CDCl}_3$

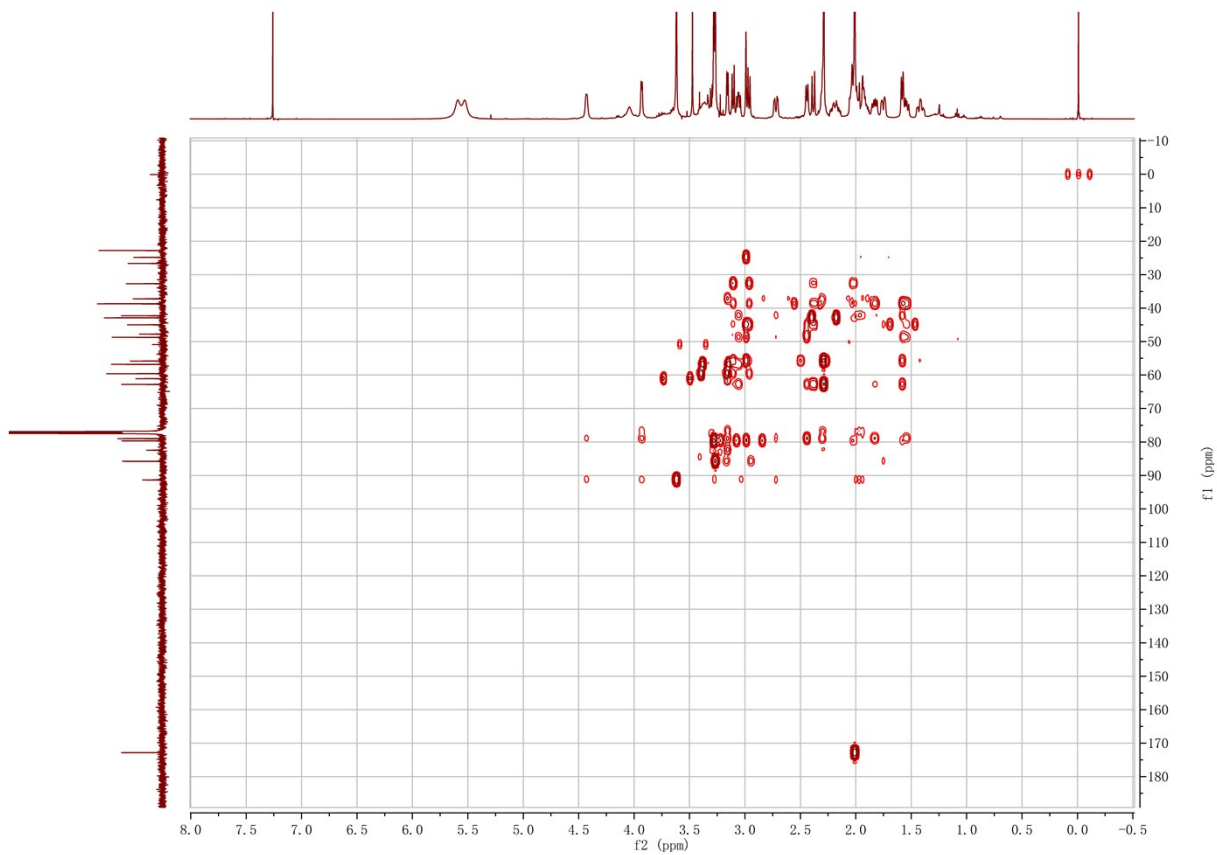

Figure S14 The HMBC spectrum of compound **14a** in  $\text{CDCl}_3$

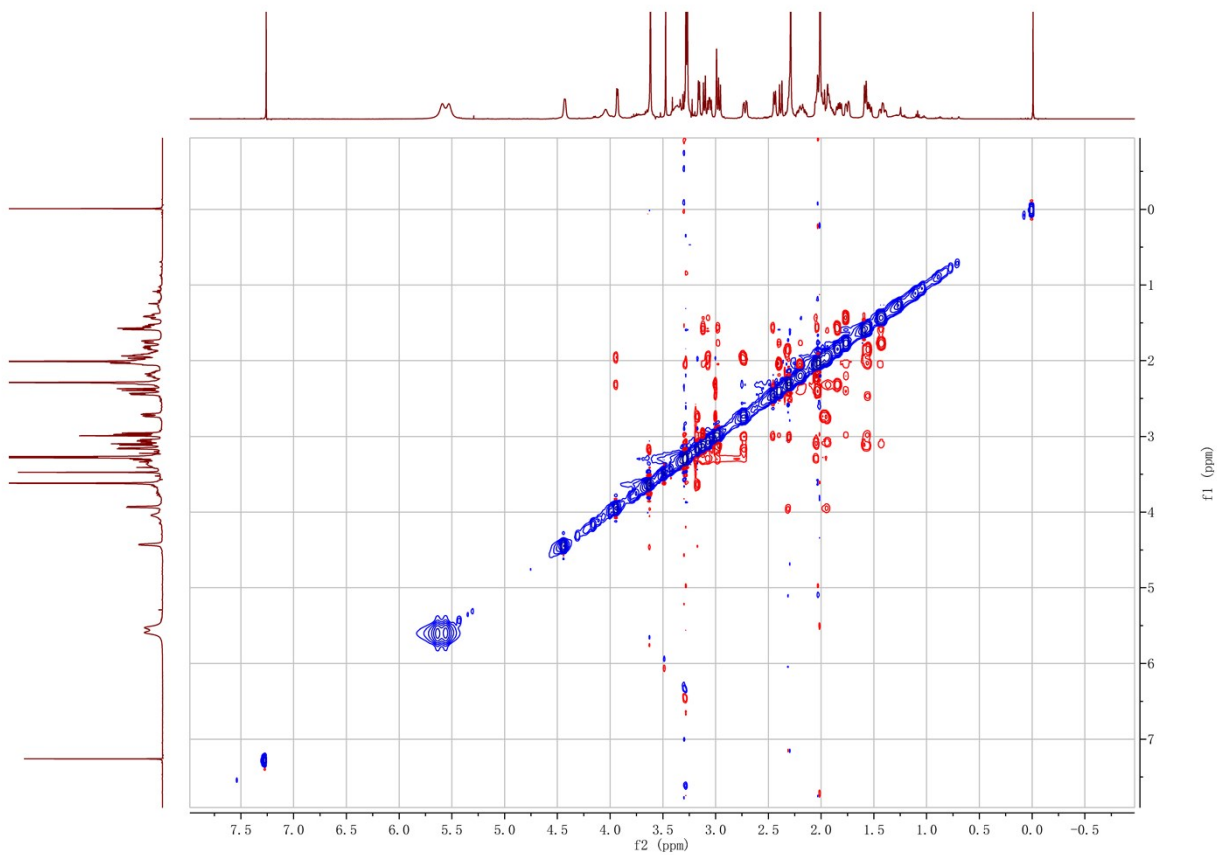

**Figure S15** The NOESY spectrum of compound **14a** in CDCl<sub>3</sub>

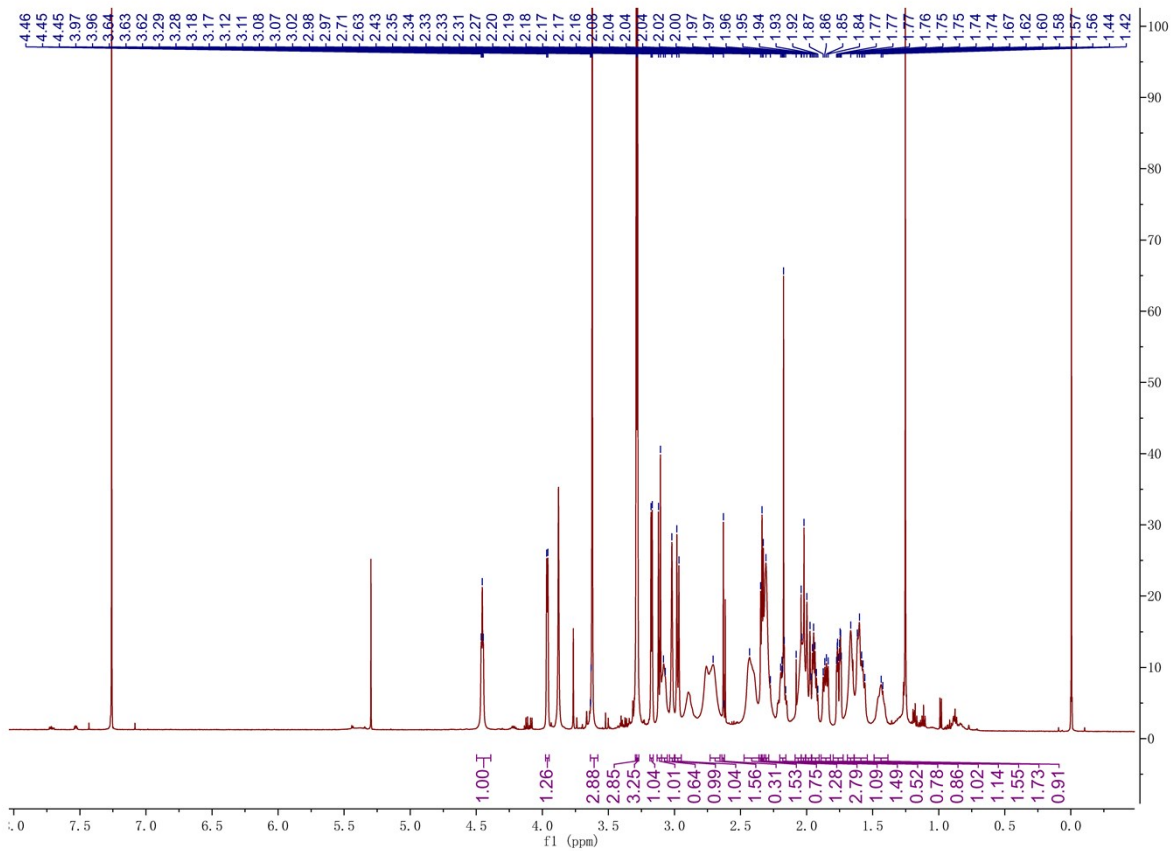

Figure S16 The <sup>1</sup>H NMR spectrum of compound **14** in CDCl<sub>3</sub> (600 MHz)



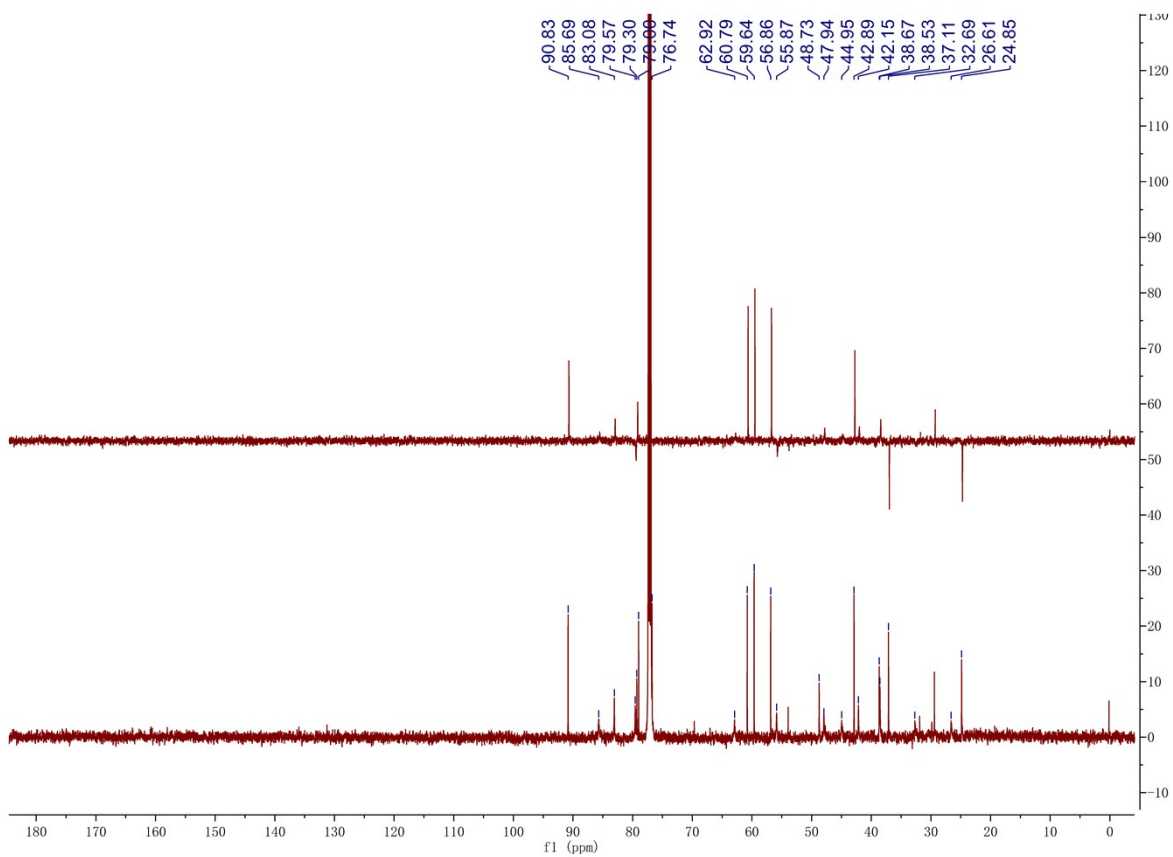

**Figure S17** The  $^{13}\text{C}$  NMR spectrum of compound **14** in  $\text{CDCl}_3$  (150 MHz)

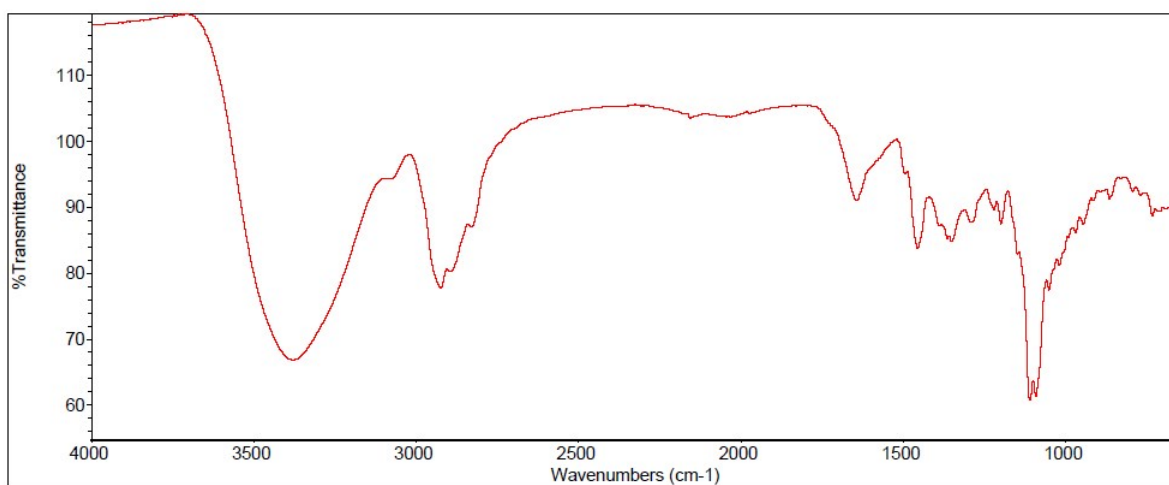

**Figure S18** The IR spectrum of compound **14**

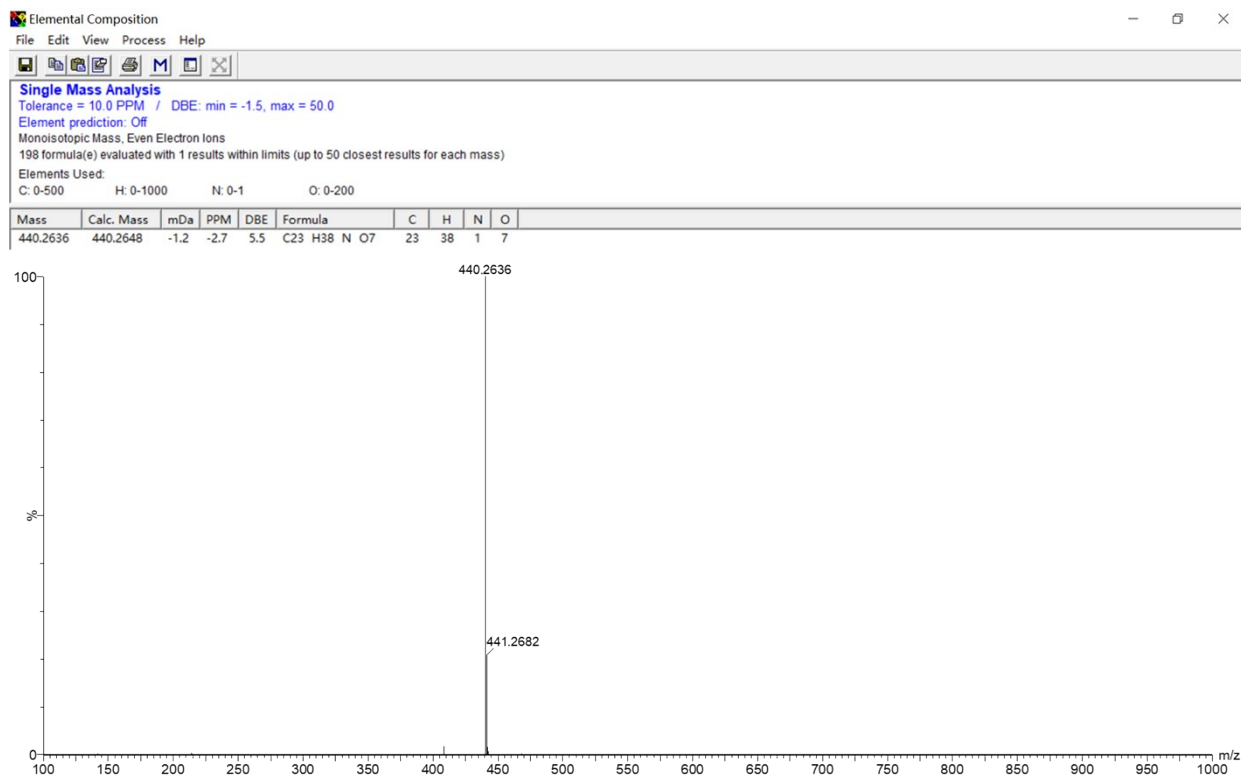

Figure S19 The HR-ESI-MS data of compound 14a

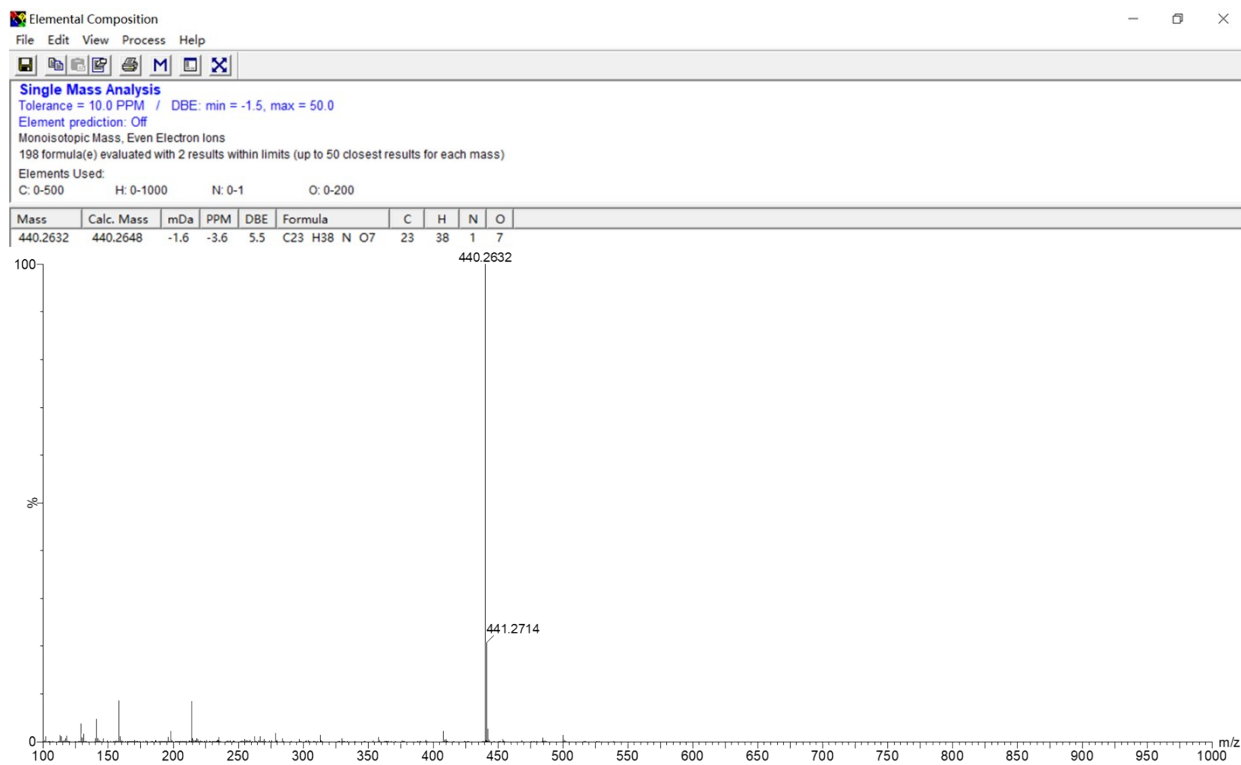

Figure S20 The HR-ESI-MS data of compound 14

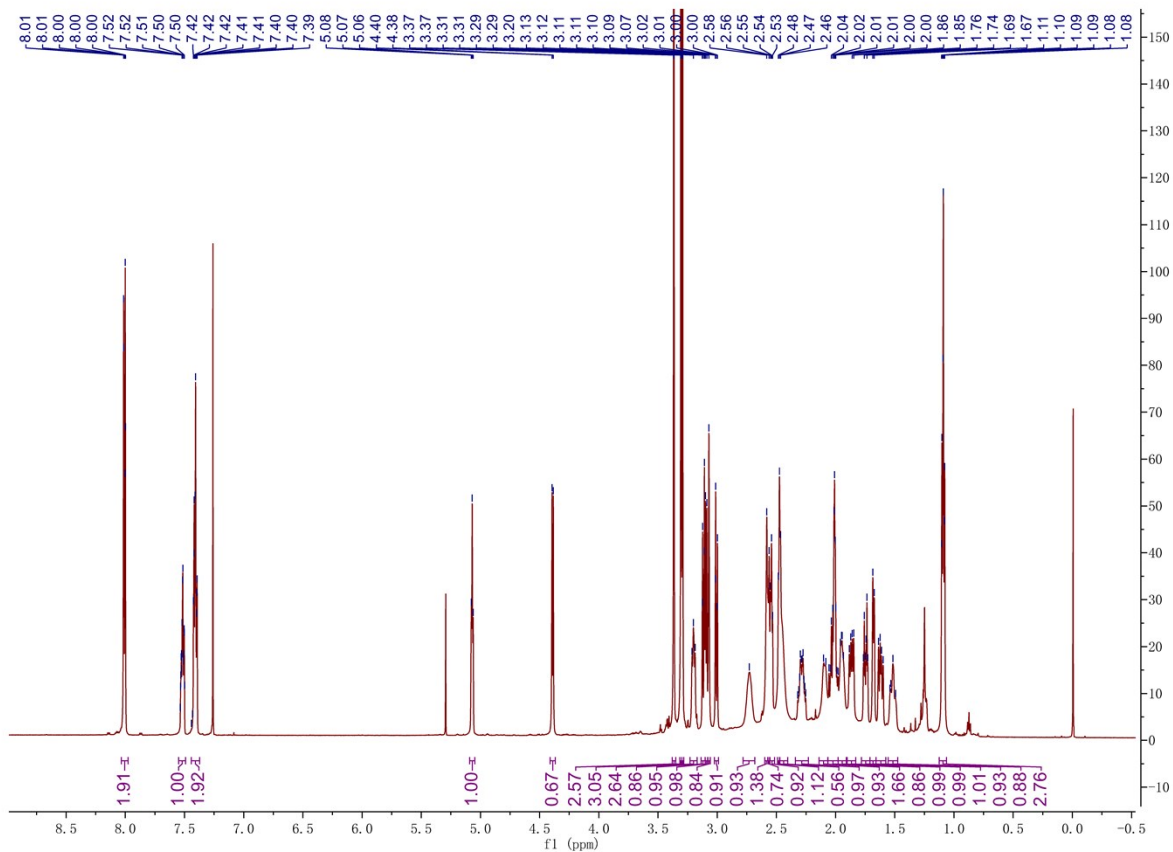

Figure S21 The  $^1\text{H}$  NMR spectrum of compound **17** in  $\text{CDCl}_3$  (600 MHz)

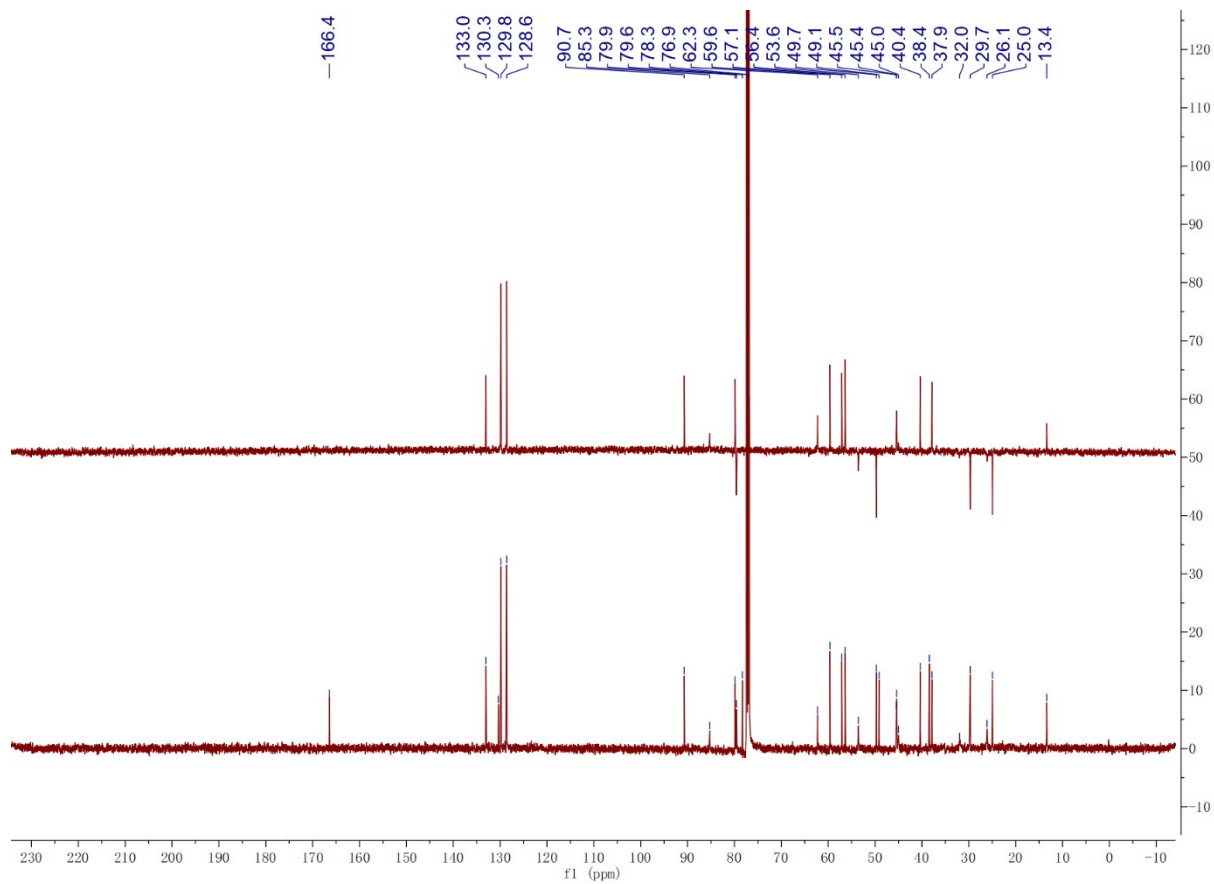

Figure S22 The  $^{13}\text{C}$  NMR spectrum of compound **17** in  $\text{CDCl}_3$  (150 MHz)

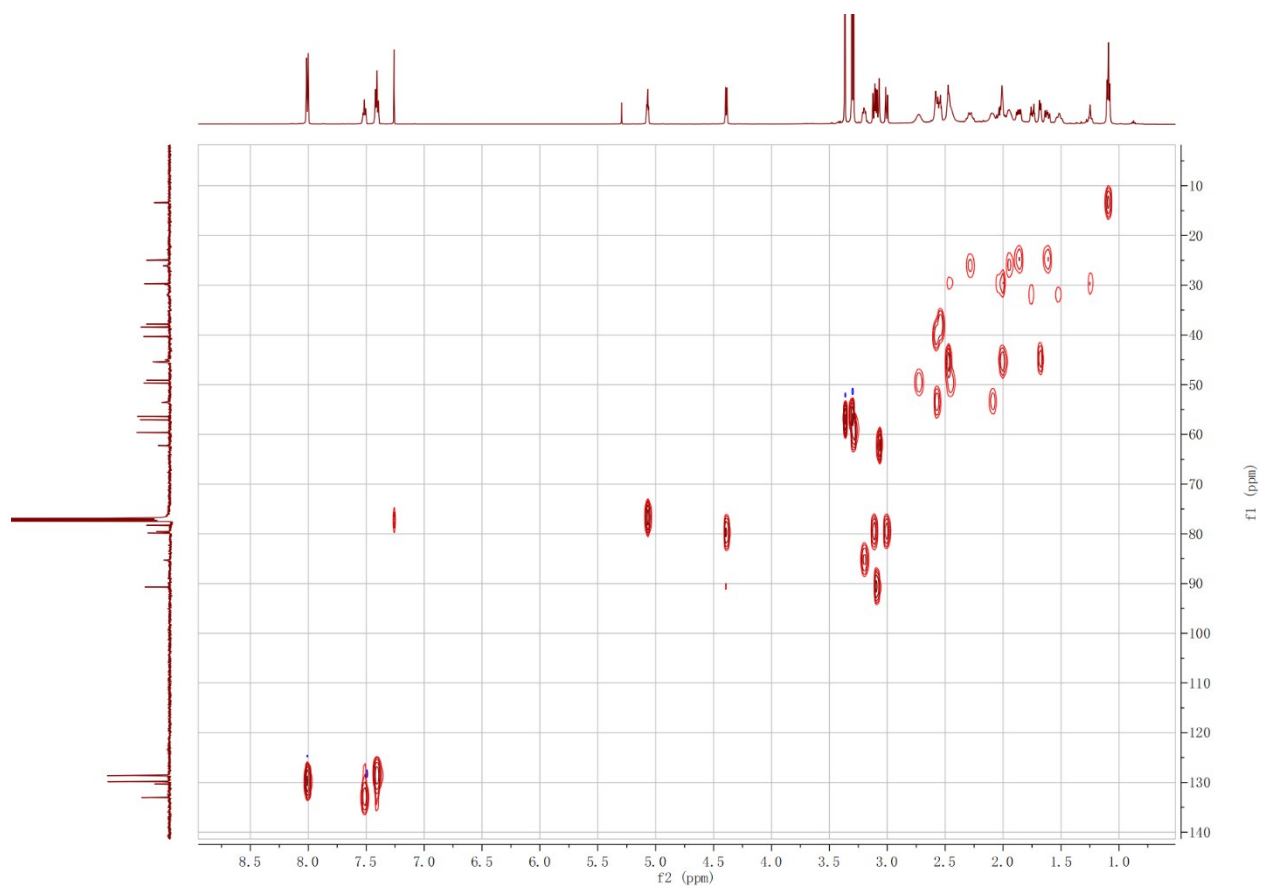

**Figure S23** The HSQC spectrum of compound **17** in  $\text{CDCl}_3$

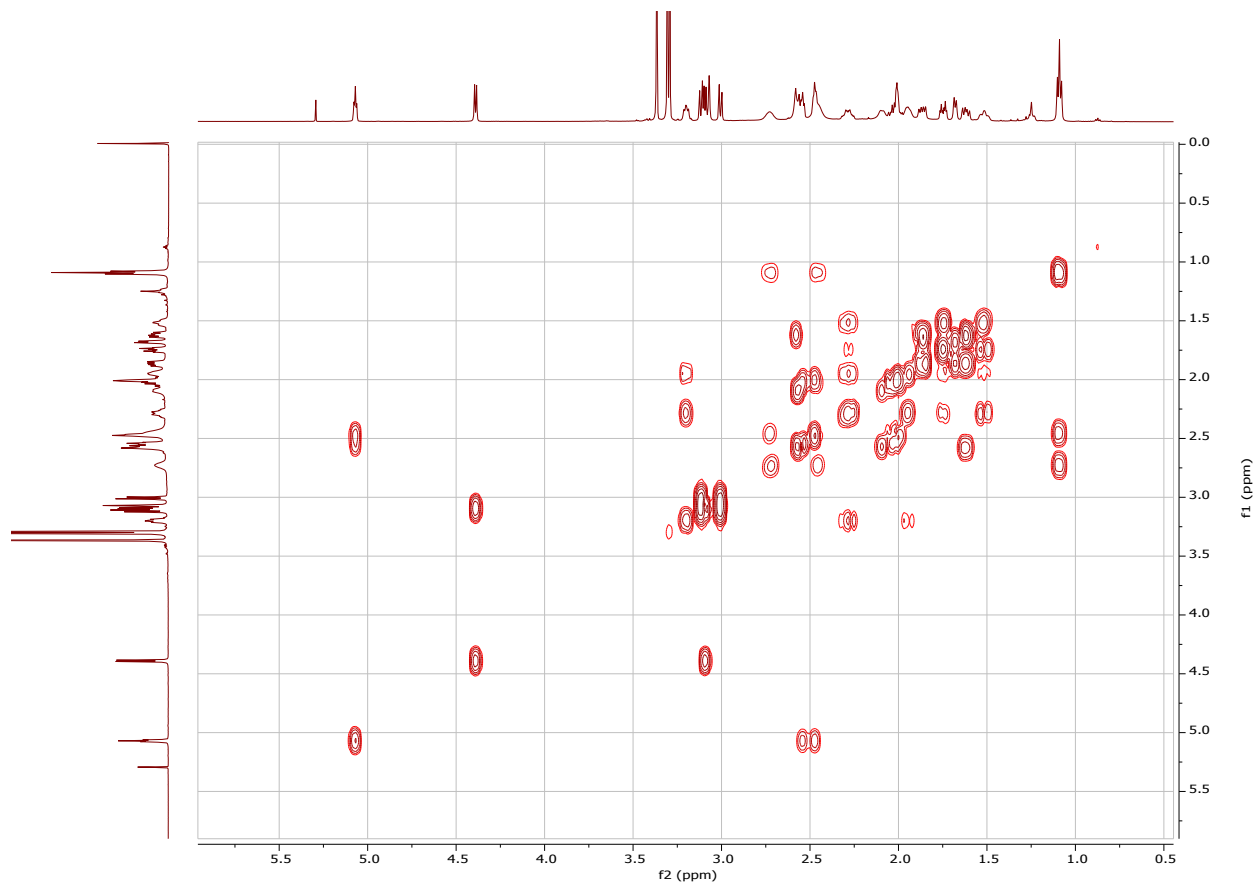

**Figure S24** The  $^1\text{H}$ - $^1\text{H}$  COSY spectrum of compound **17** in  $\text{CDCl}_3$

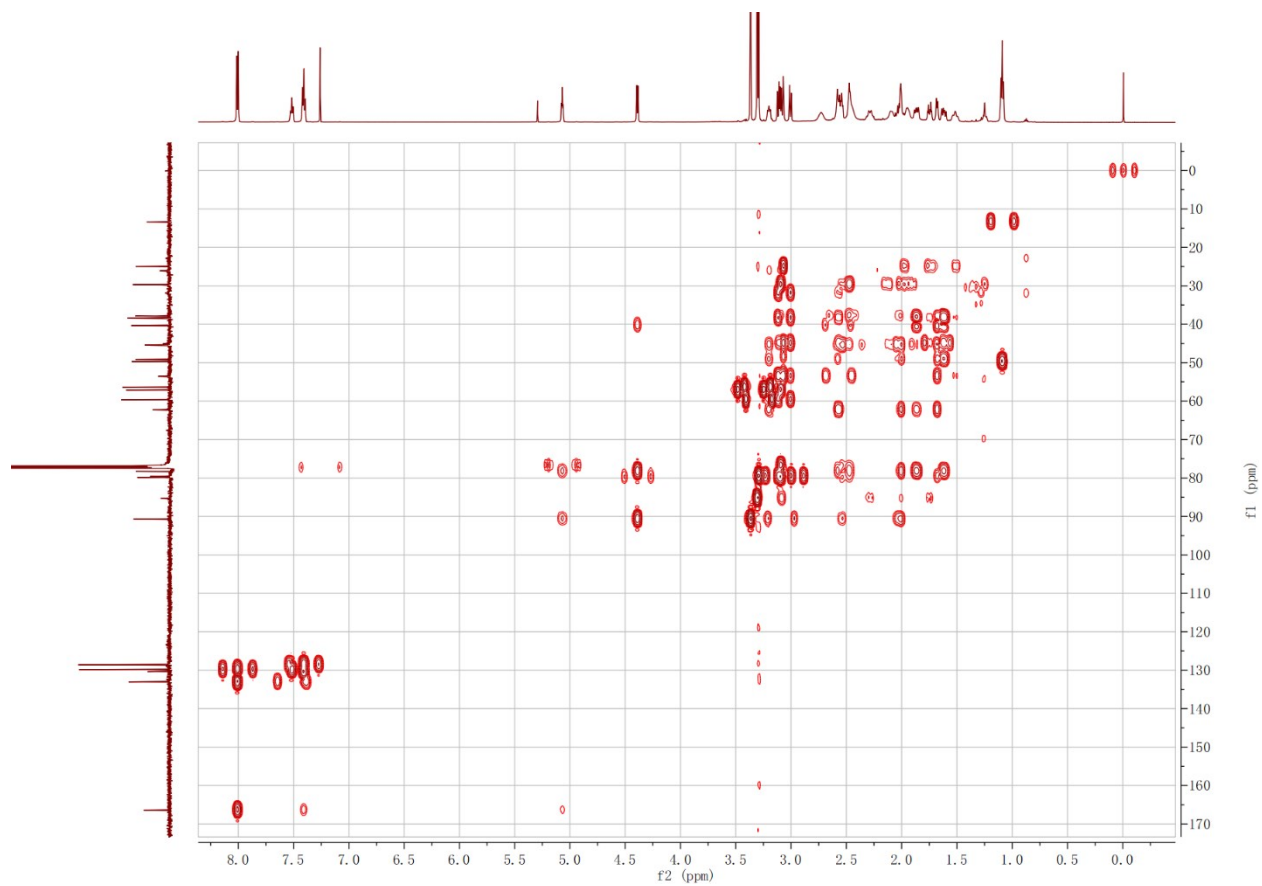

**Figure S25** The HMBC spectrum of compound **17** in CDCl<sub>3</sub>

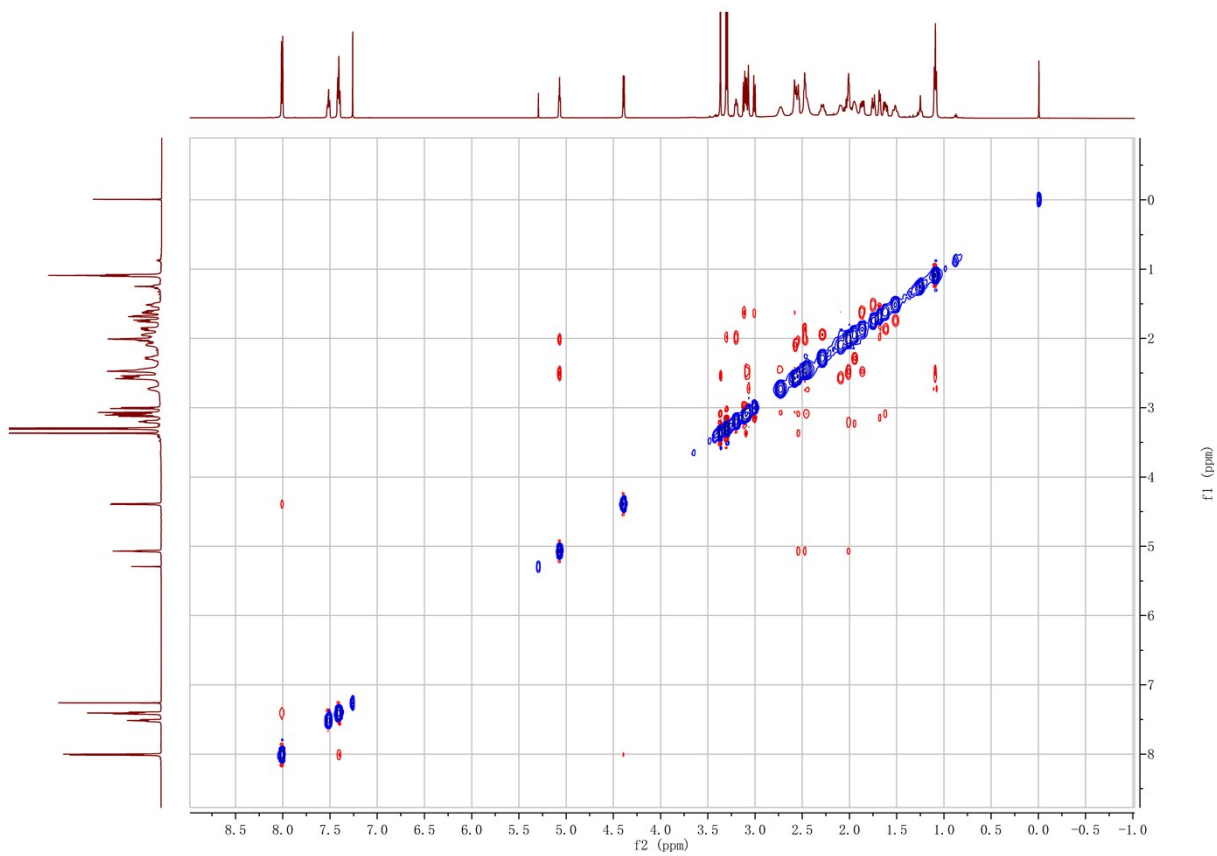

**Figure S26** The NOESY spectrum of compound **17** in CDCl<sub>3</sub>



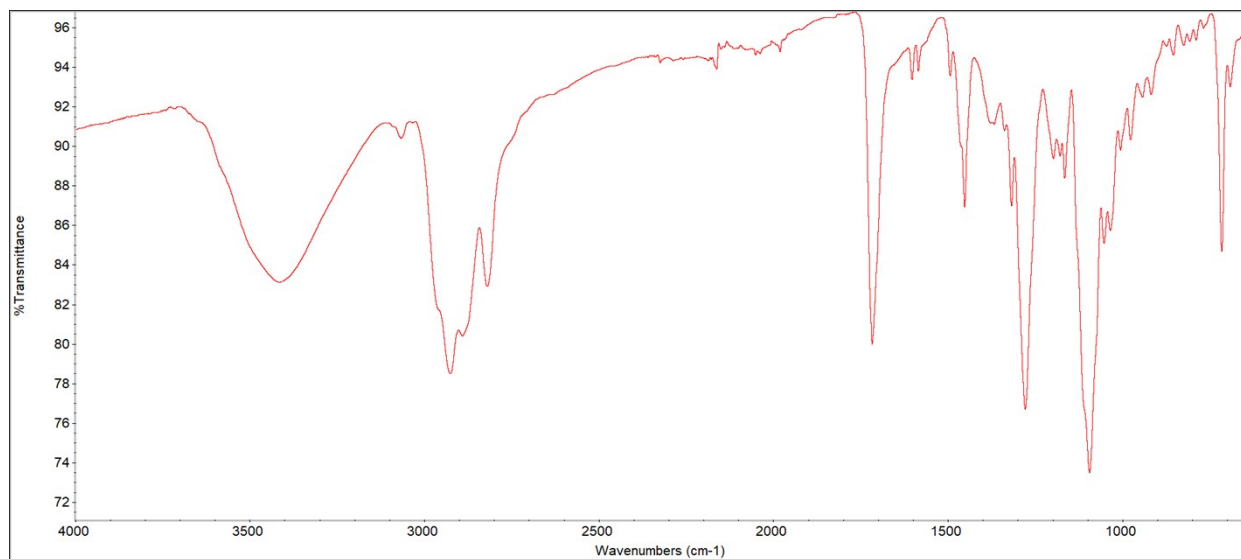

**Figure S27** The IR spectrum of compound **17**

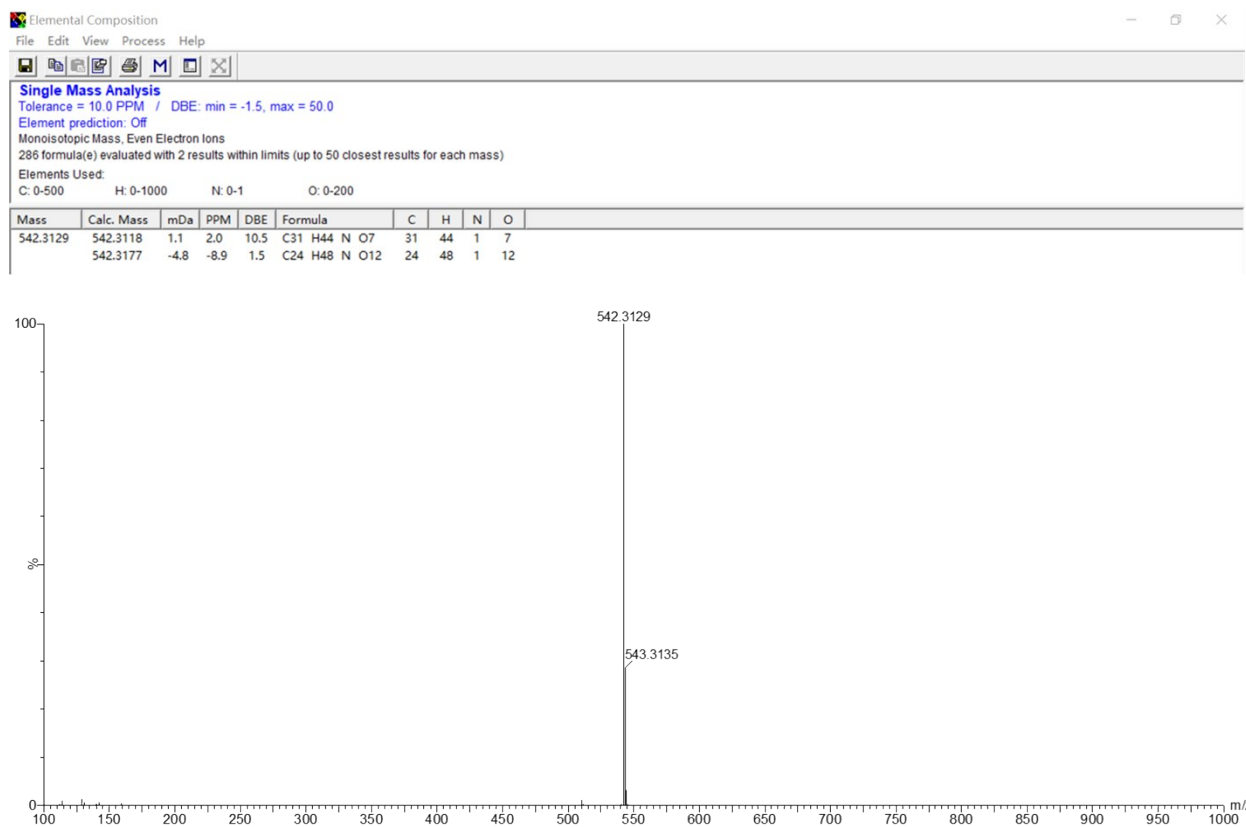

**Figure S28** The HR-ESI-MS data of compound **17**

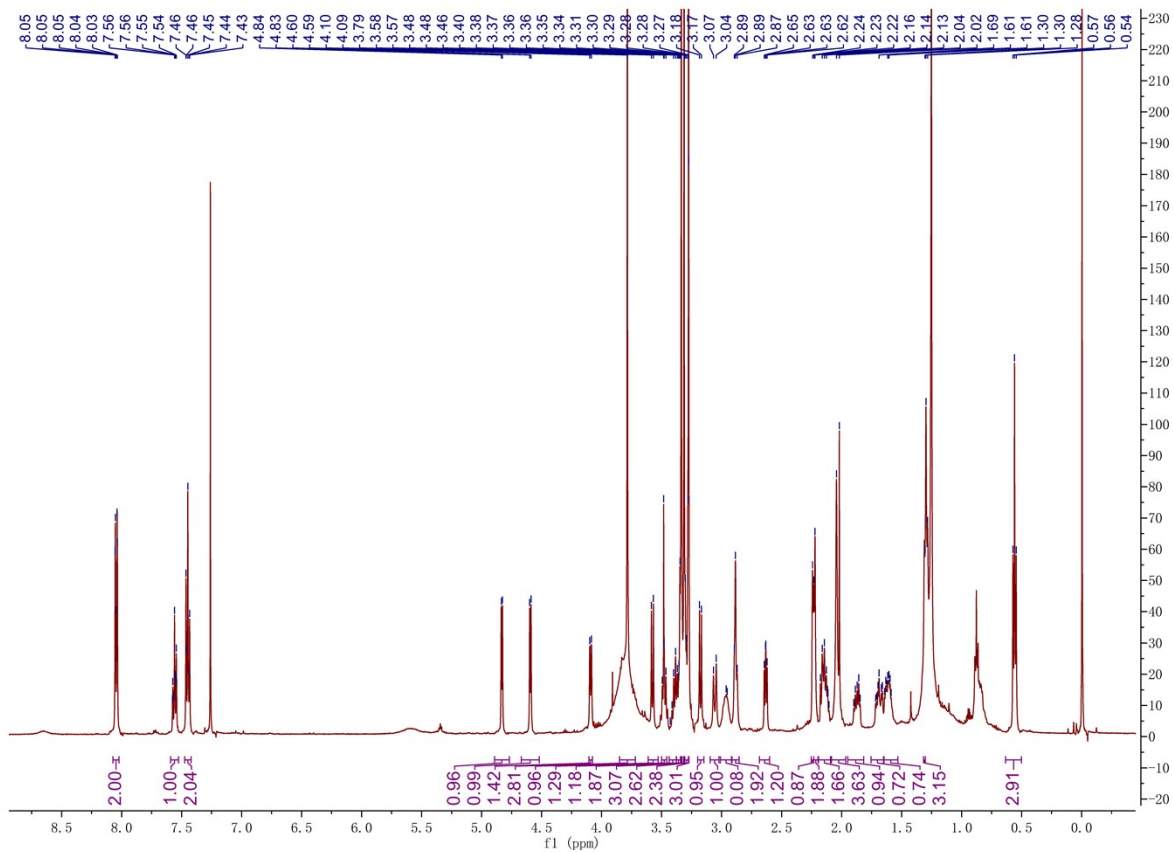

Figure S29 The  $^1\text{H}$  NMR spectrum of compound **25** in  $\text{CDCl}_3$  (500 MHz)

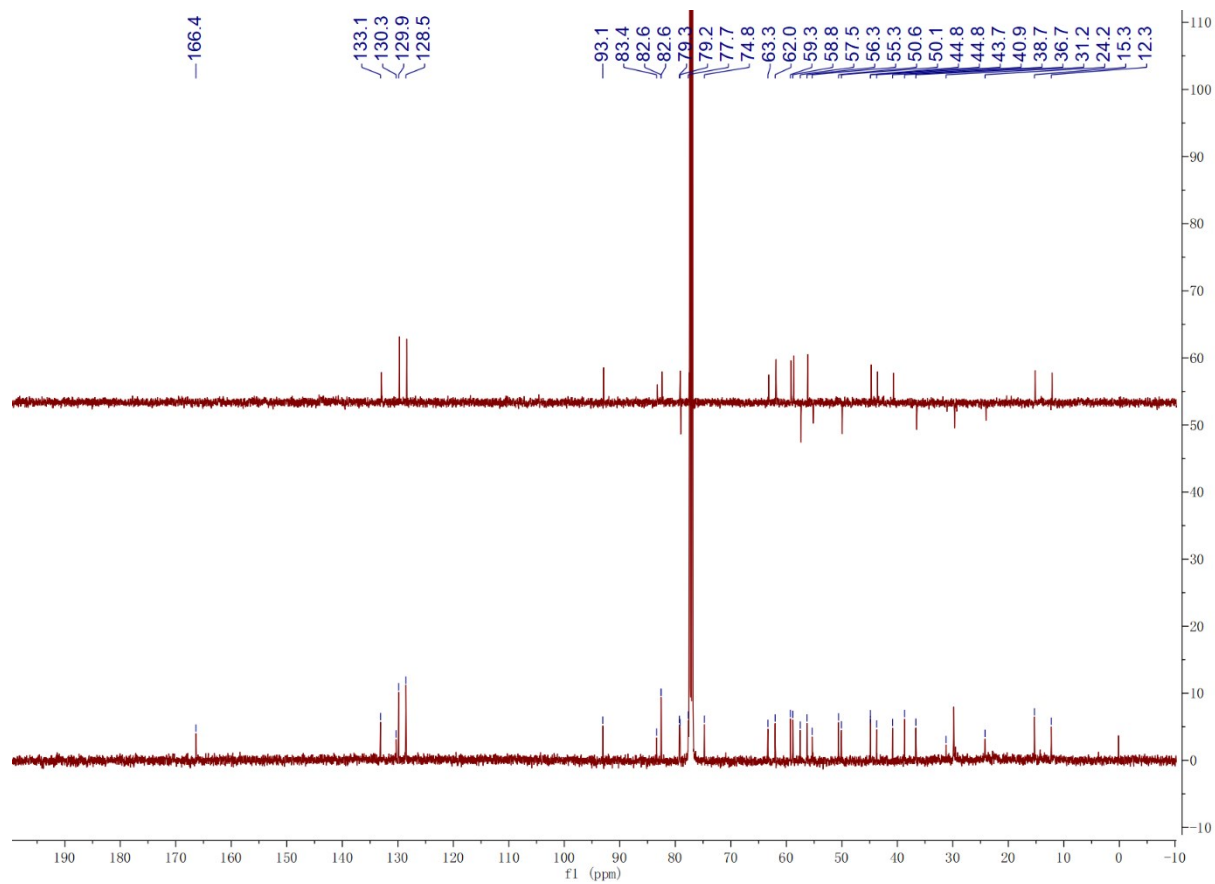

Figure S30 The  $^{13}\text{C}$  NMR spectrum of compound **25** in  $\text{CDCl}_3$  (125 MHz)

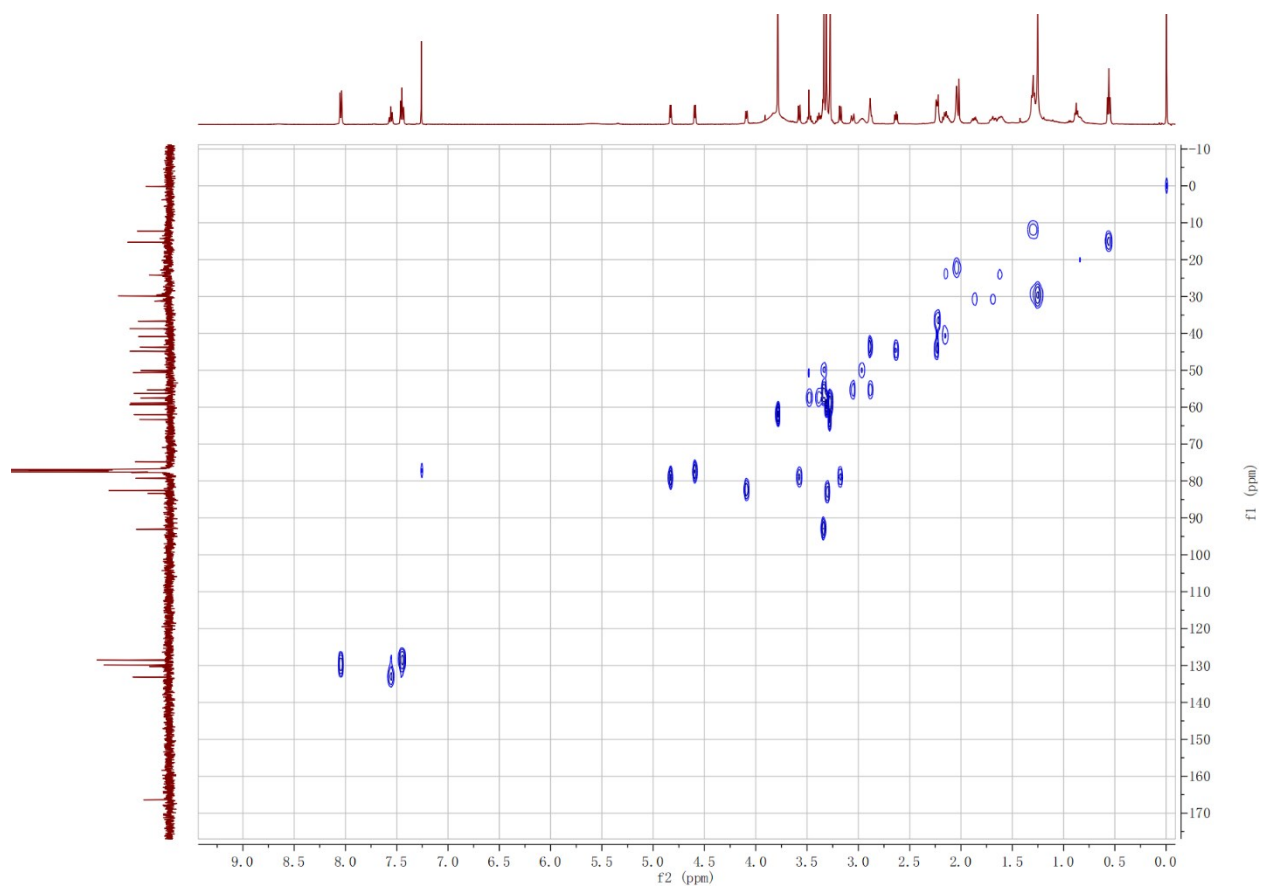

**Figure S31** The HSQC spectrum of compound **25** in CDCl<sub>3</sub>

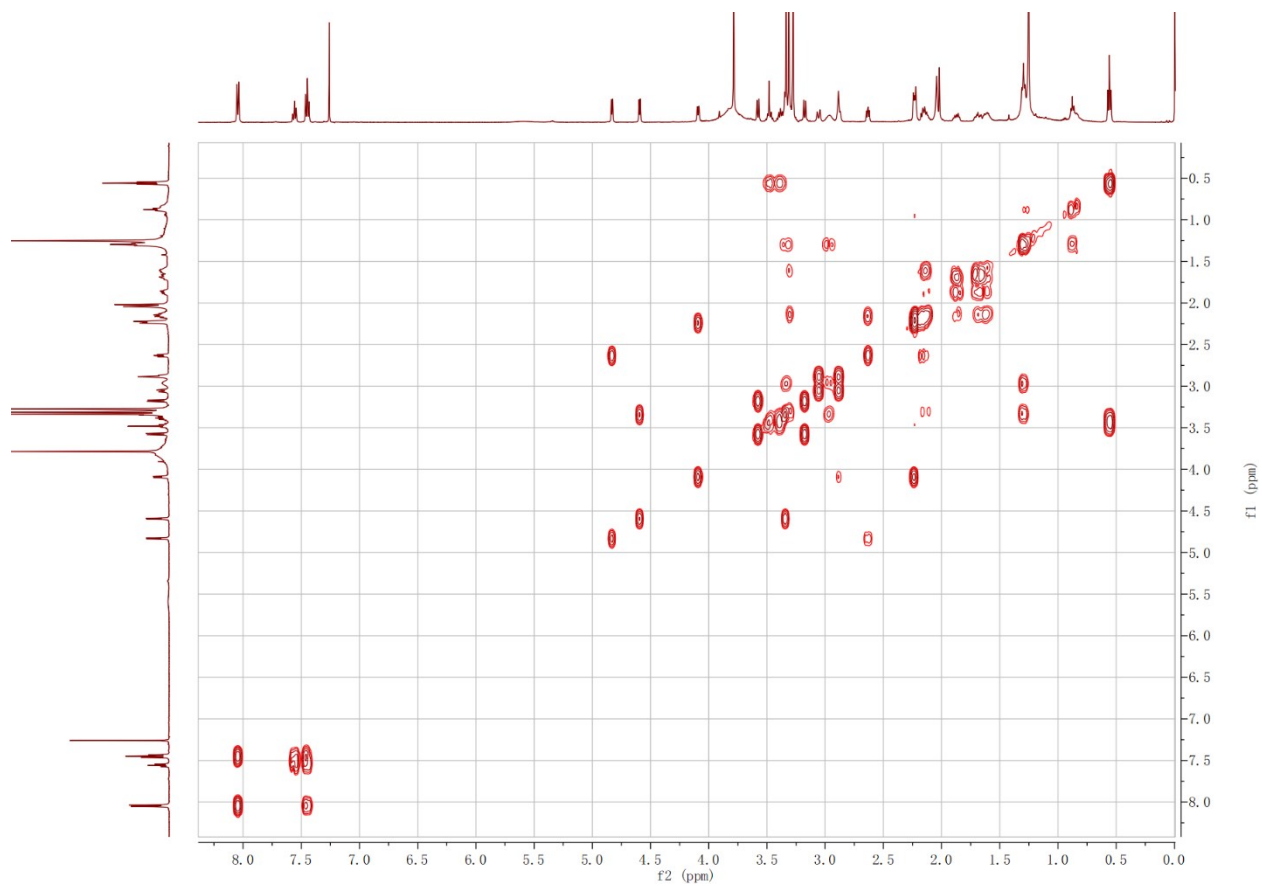

**Figure S32** The  $^1\text{H}$ - $^1\text{H}$  COSY spectrum of compound **25** in  $\text{CDCl}_3$

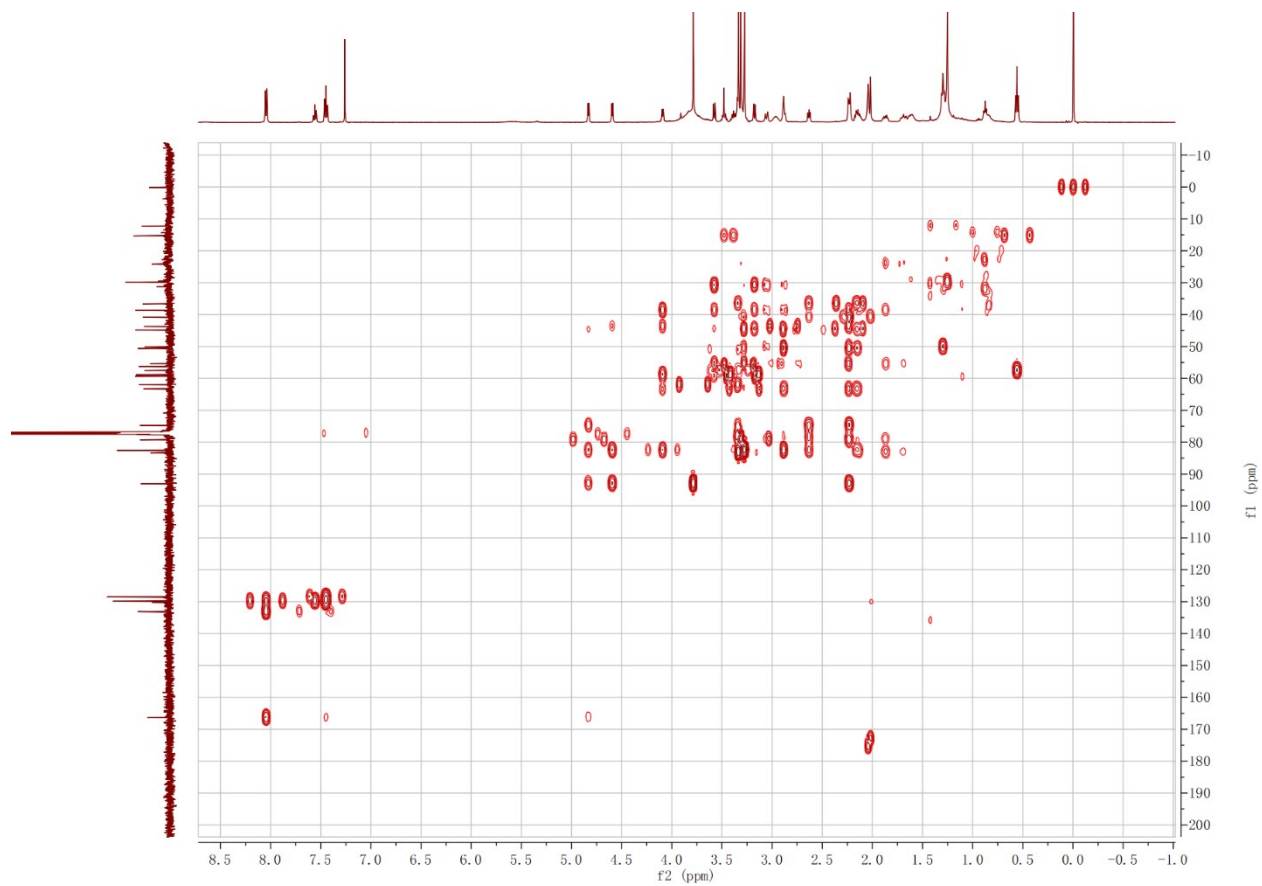

**Figure S33** The HMBC spectrum of compound **25** in  $\text{CDCl}_3$

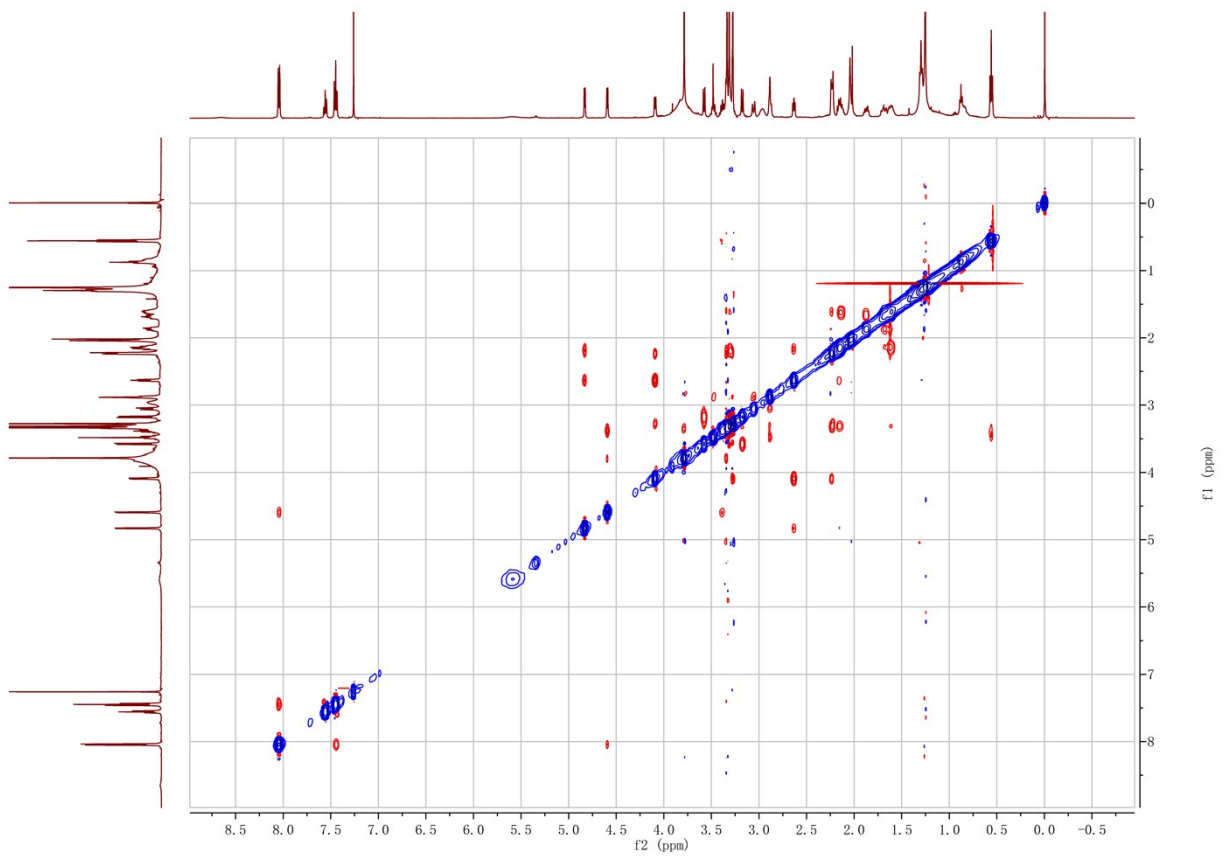

**Figure S34** The NOESY spectrum of compound **25** in CDCl<sub>3</sub>

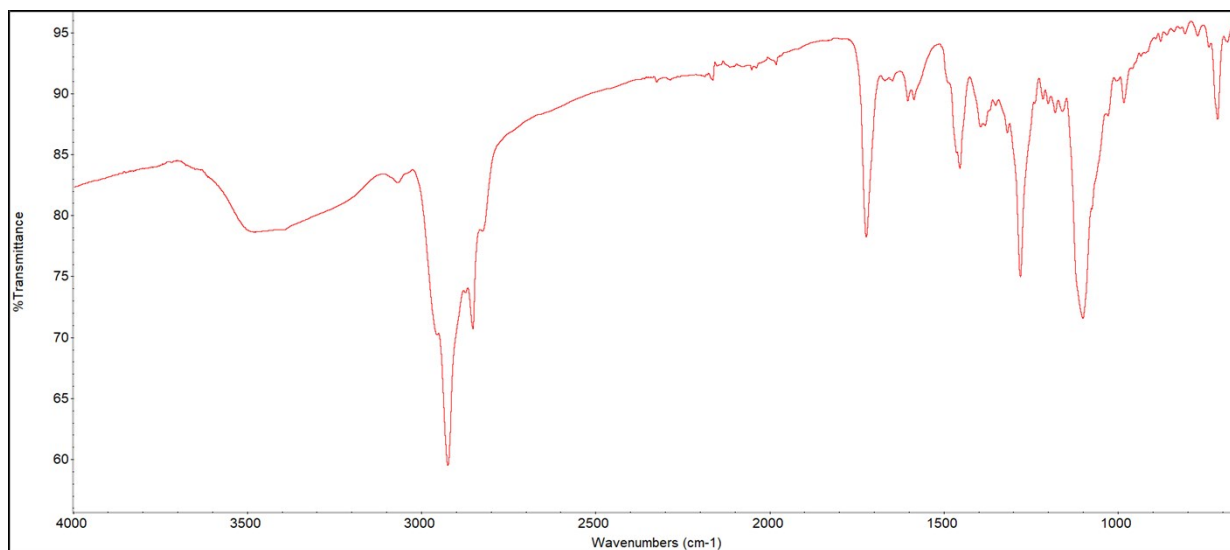

Figure S35 The IR spectrum of compound 25

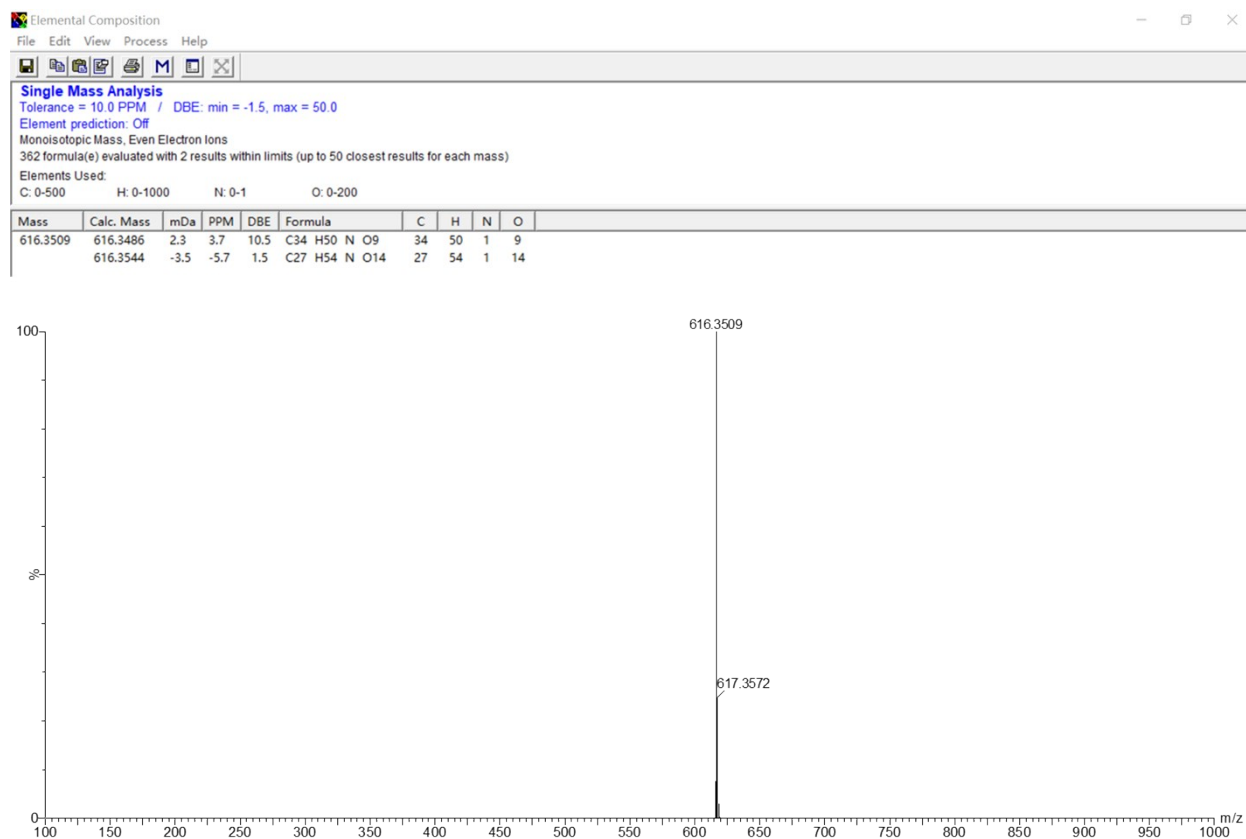

Figure S36 The HR-ESI-MS data of compound 25



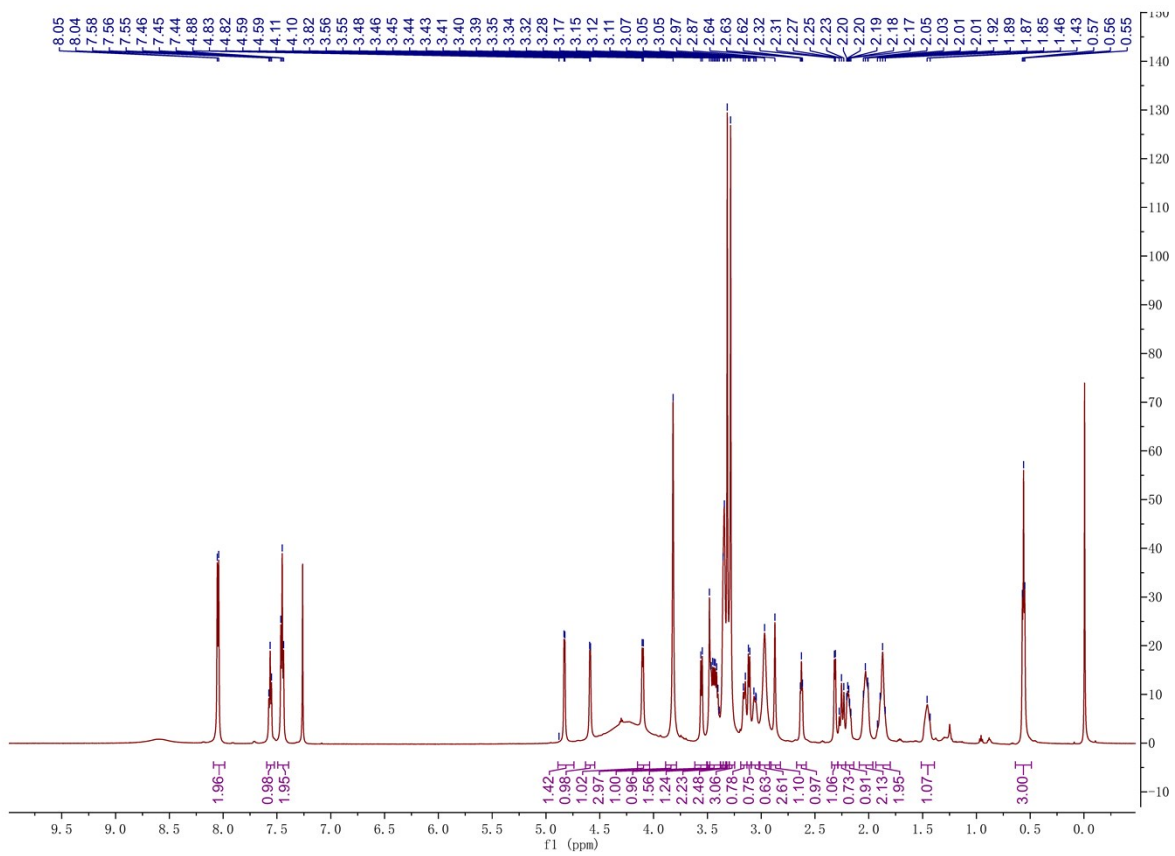

Figure S37 The  $^1\text{H}$  NMR spectrum of compound **26** in  $\text{CDCl}_3$  (600 MHz)

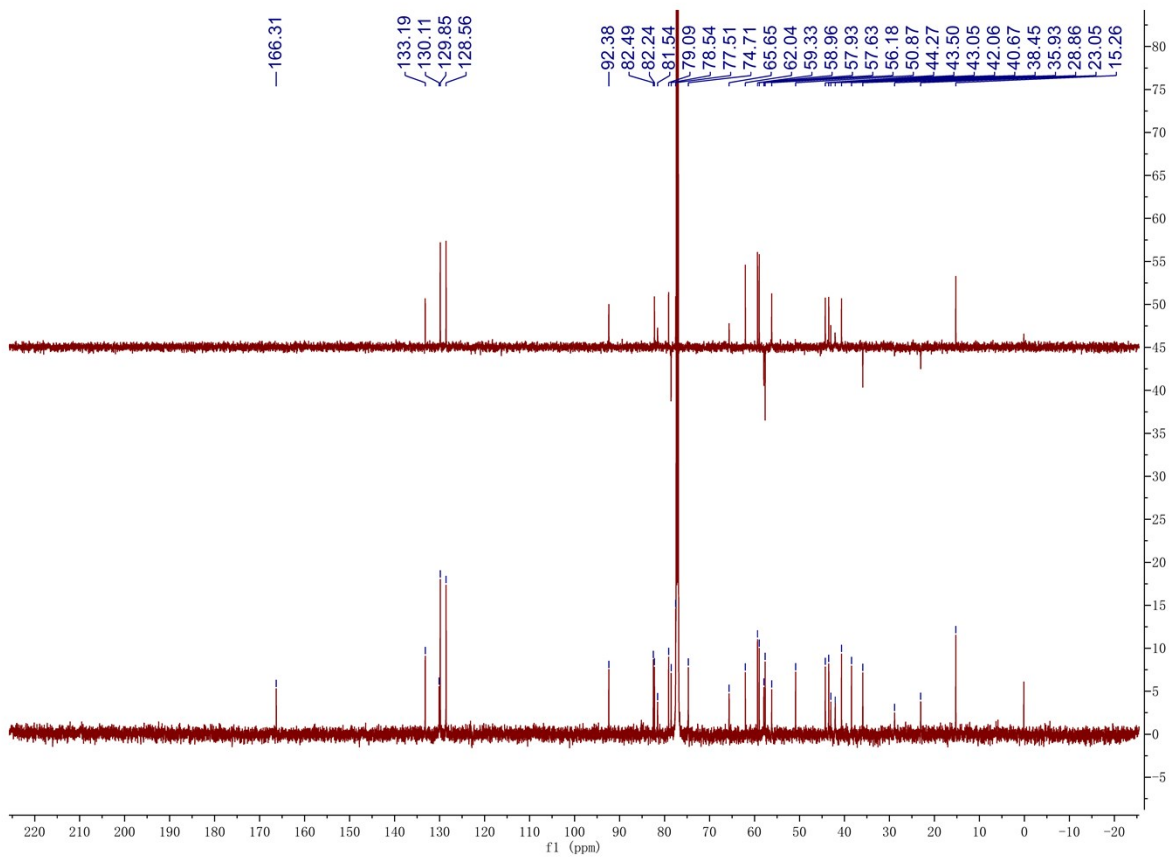

Figure S38 The  $^{13}\text{C}$  NMR spectrum of compound **26** in  $\text{CDCl}_3$  (150 MHz)

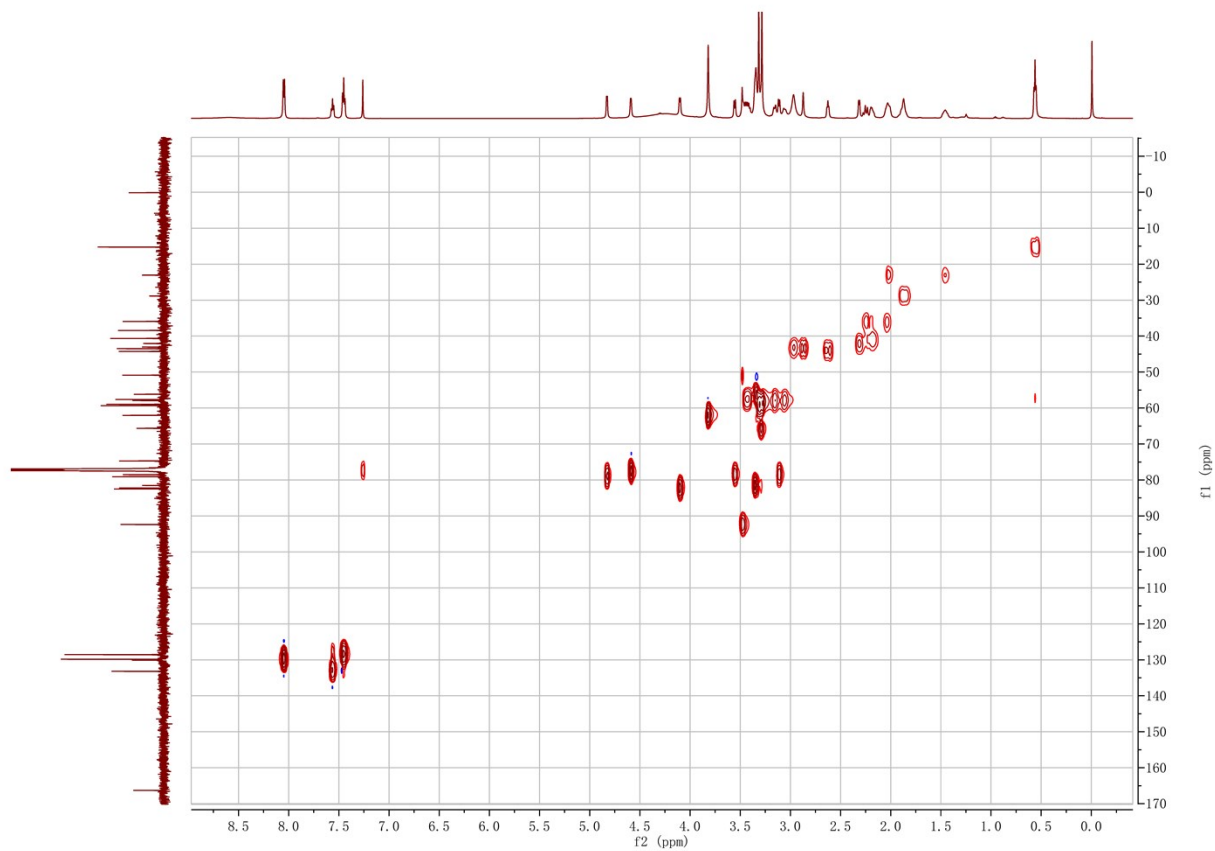

**Figure S39** The HSQC spectrum of compound **26** in CDCl<sub>3</sub>

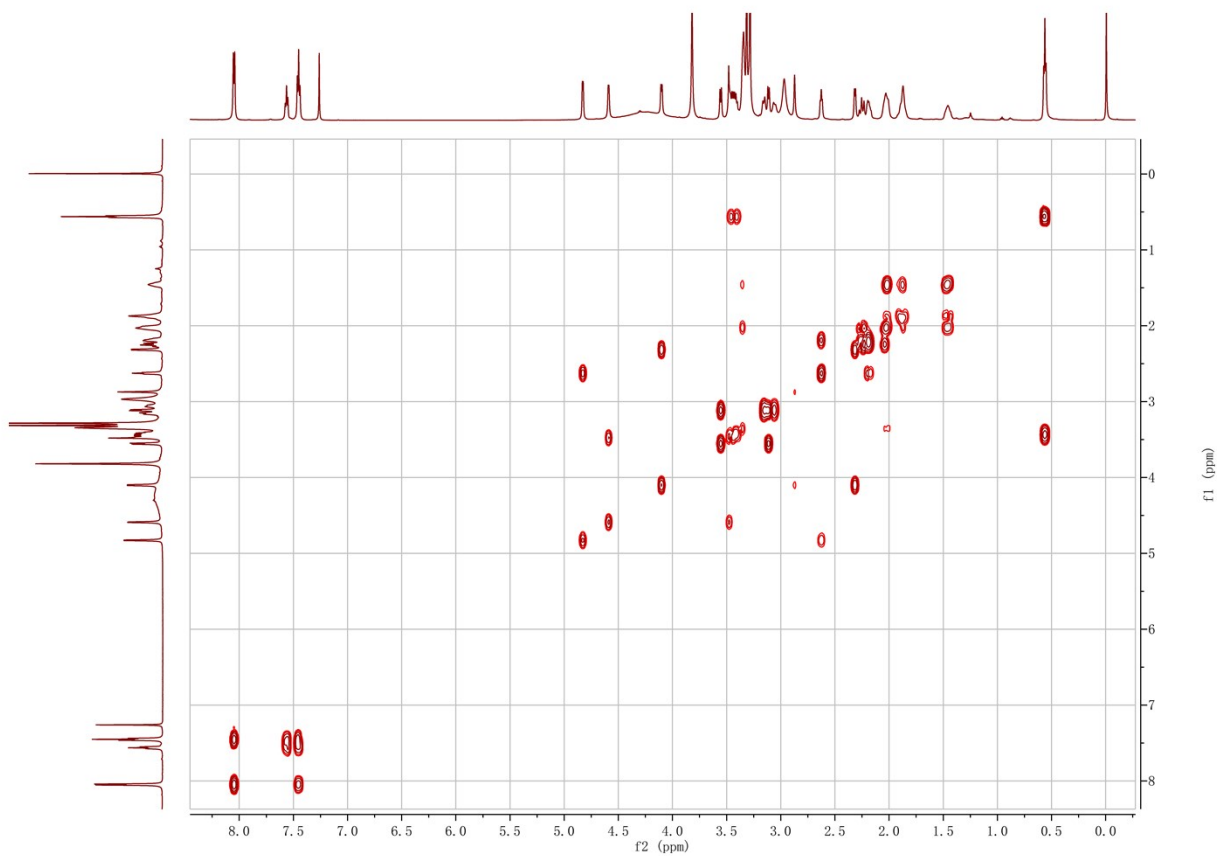

**Figure S40** The  $^1\text{H}$ - $^1\text{H}$  COSY spectrum of compound **26** in  $\text{CDCl}_3$

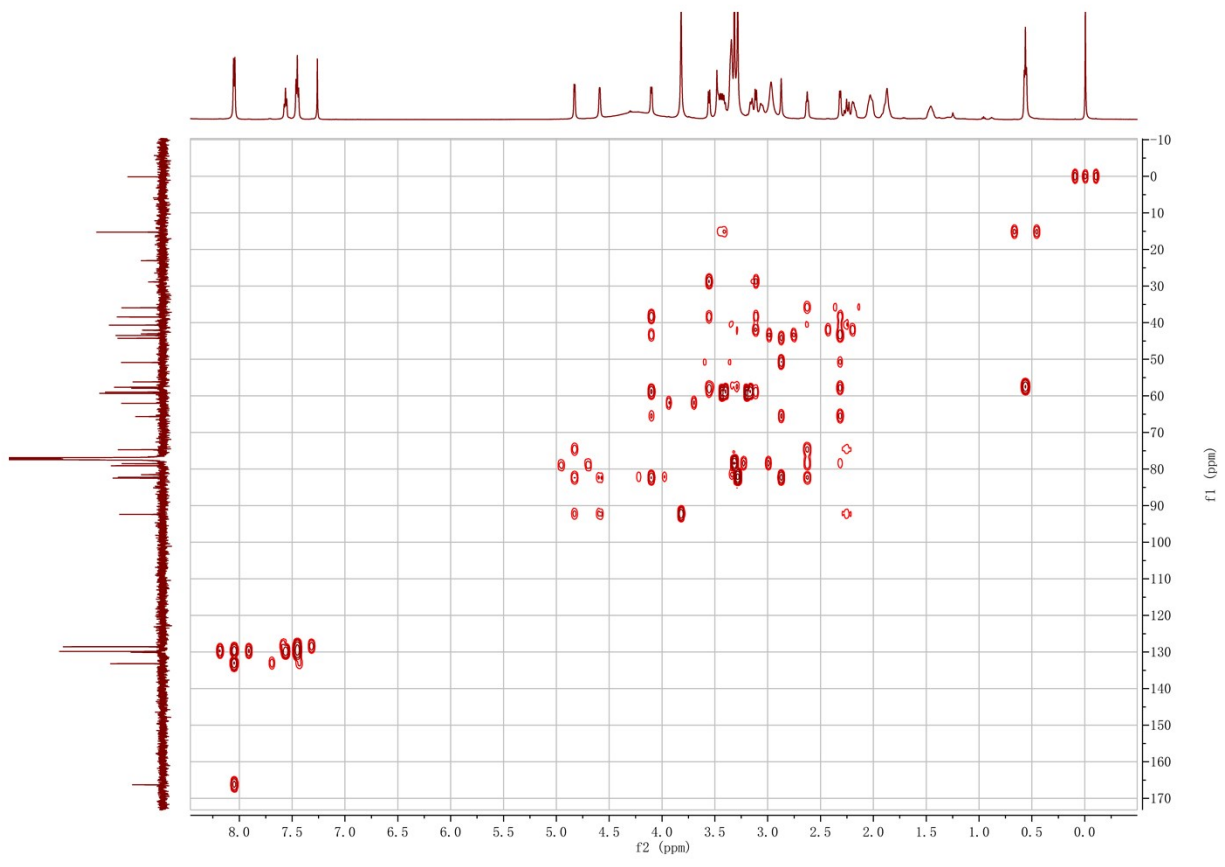

**Figure S41** The HMBC spectrum of compound **26** in  $\text{CDCl}_3$

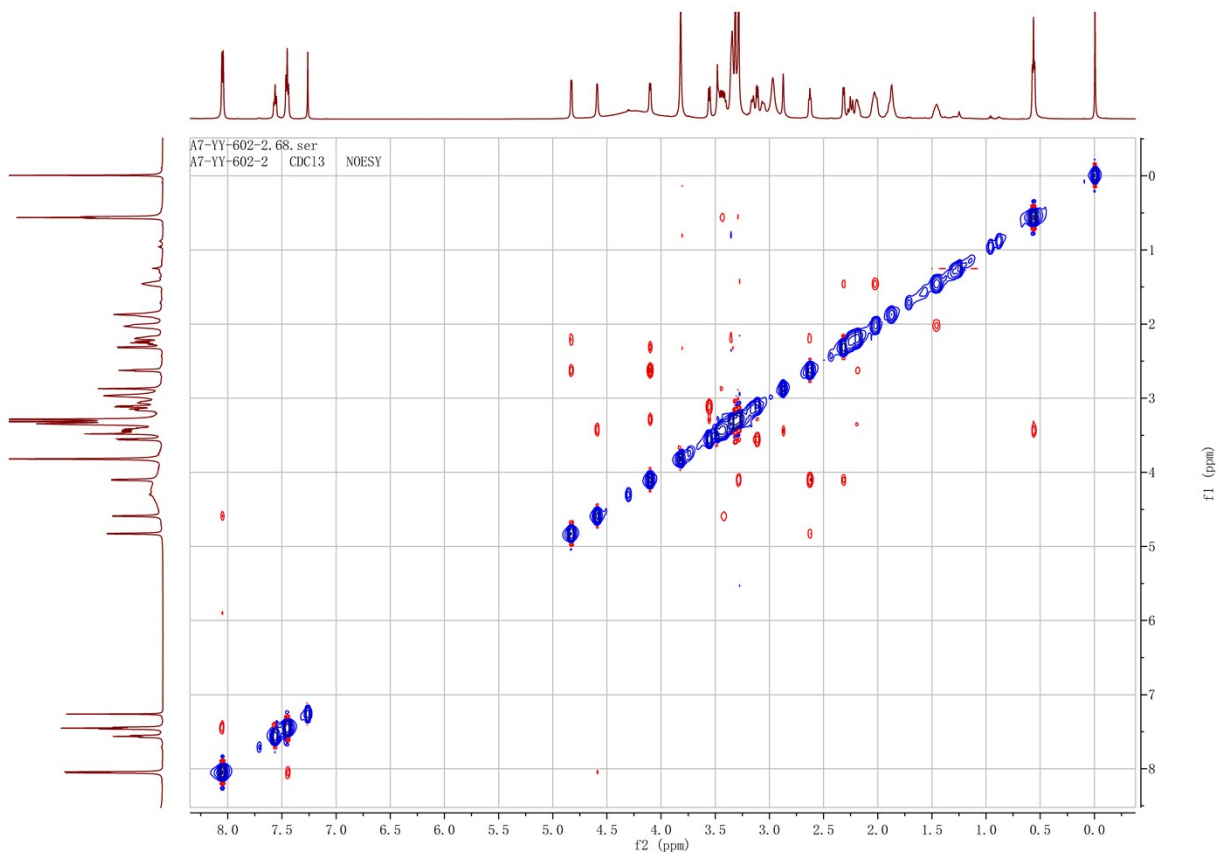

Figure S42 The NOESY spectrum of compound **26** in CDCl<sub>3</sub>

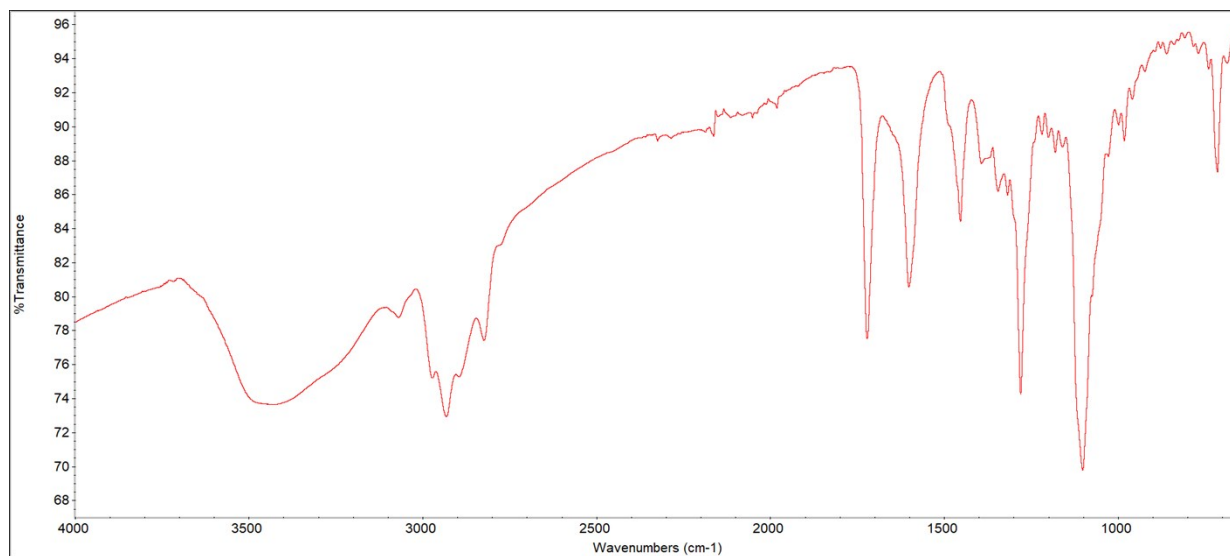

Figure S43 The IR spectrum of compound 26

Elemental Composition

File Edit View Process Help

Single Mass Analysis  
Tolerance = 10.0 PPM / DBE: min = -1.5, max = 50.0  
Element prediction: Off  
Monoisotopic Mass, Even Electron Ions  
346 formula(e) evaluated with 2 results within limits (up to 50 closest results for each mass)  
Elements Used:  
C: 0-500 H: 0-1000 N: 0-1 O: 0-200

| Mass     | Calc. Mass | mDa  | PPM  | DBE  | Formula       | C  | H  | N | O  |
|----------|------------|------|------|------|---------------|----|----|---|----|
| 602.3336 | 602.3329   | 0.7  | 1.2  | 10.5 | C33 H48 N O9  | 33 | 48 | 1 | 9  |
|          | 602.3388   | -5.2 | -8.6 | 1.5  | C26 H52 N O14 | 26 | 52 | 1 | 14 |

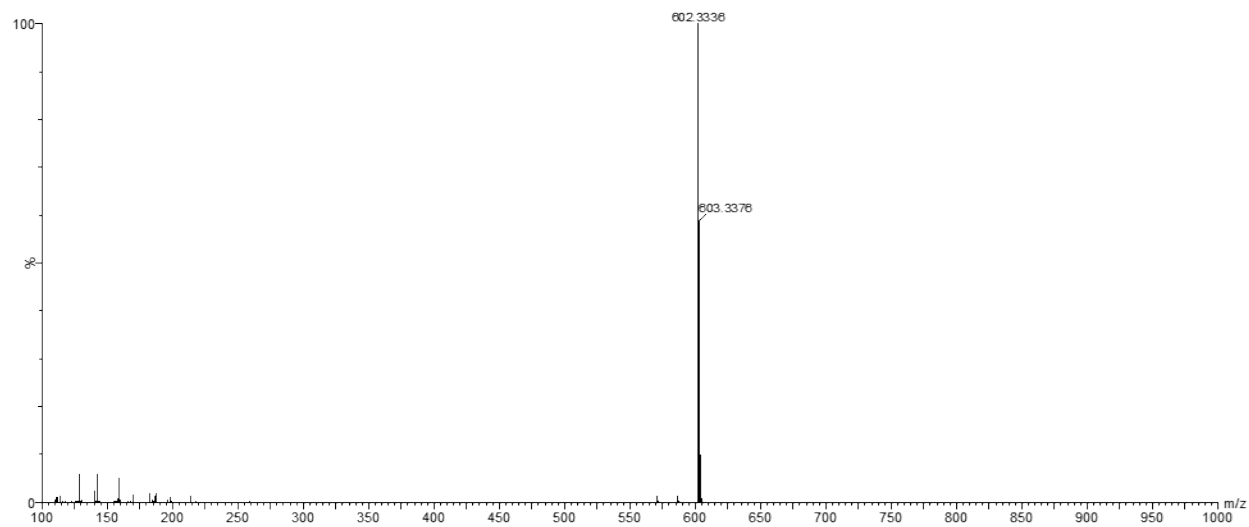

Figure S44 The HR-ESI-MS data of compound 26

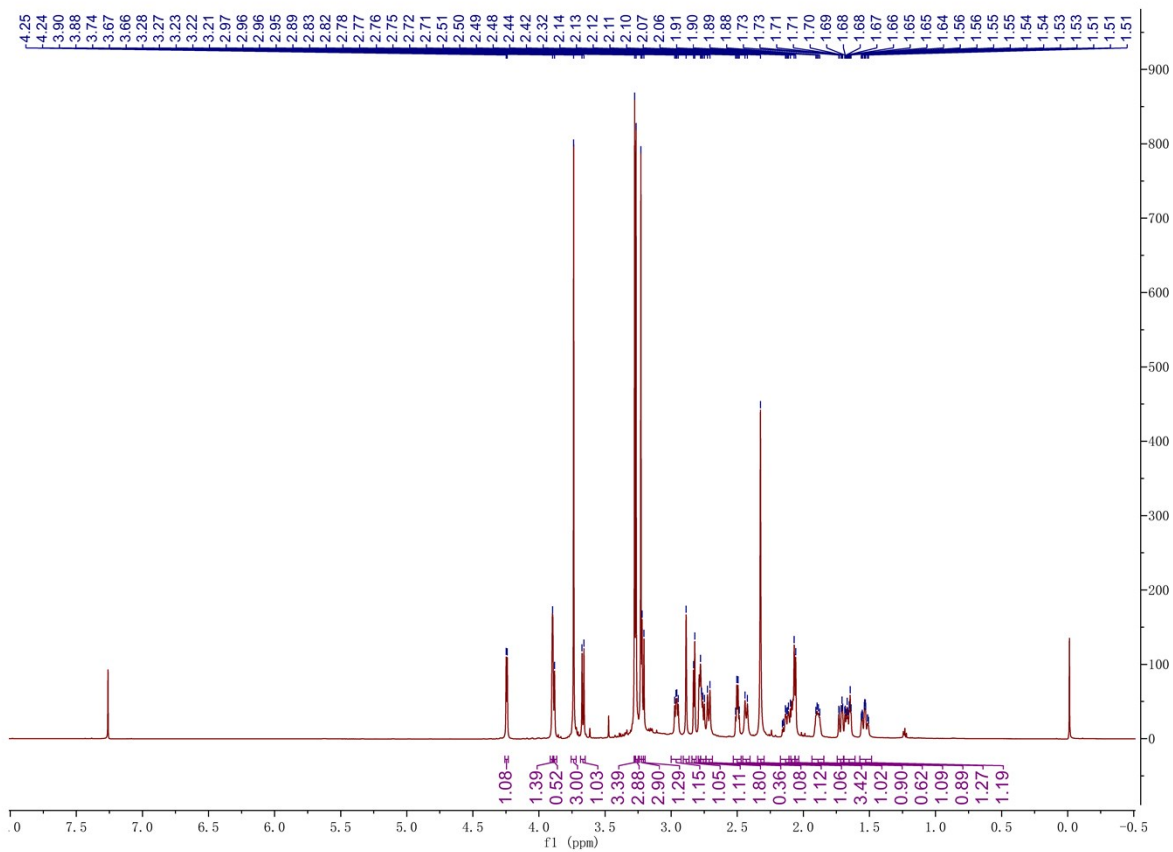

Figure S45 The  $^1\text{H}$  NMR spectrum of compound **37** in  $\text{CDCl}_3$  (600 MHz)



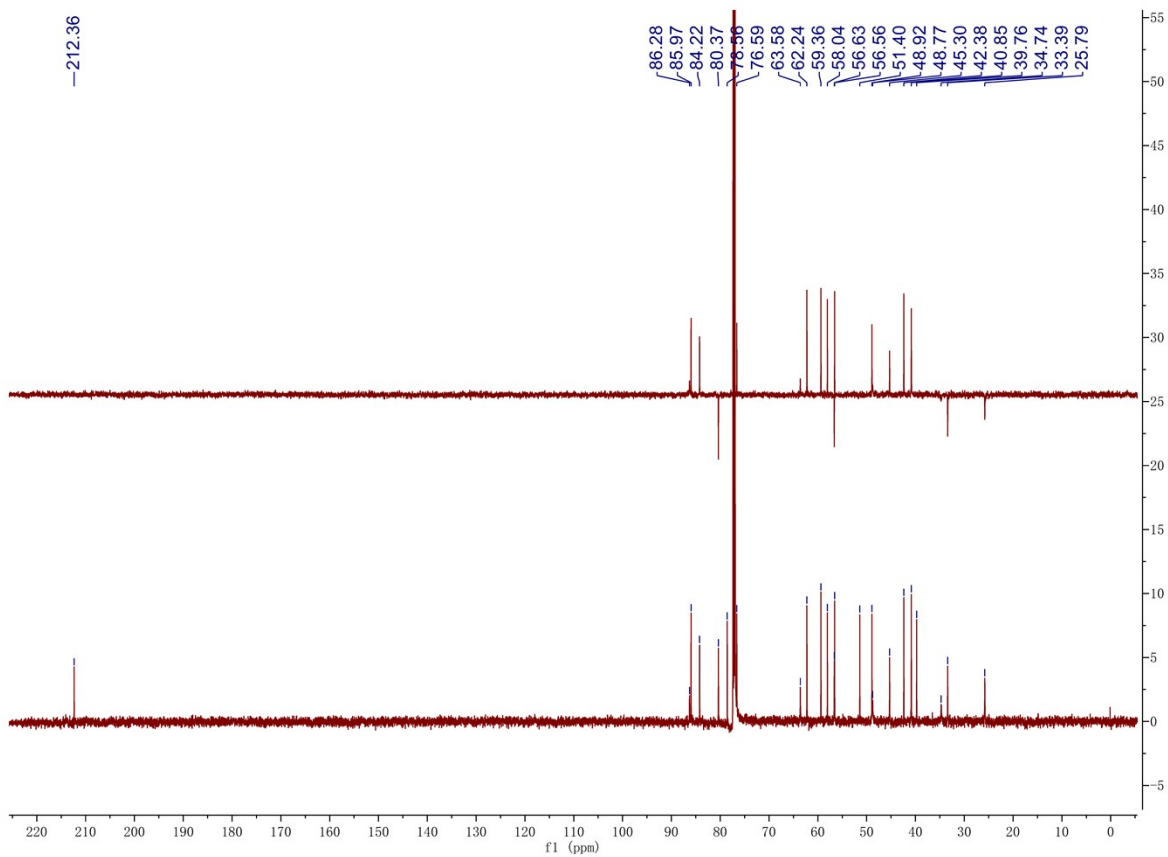

Figure S46 The  $^{13}\text{C}$  NMR spectrum of compound **37** in  $\text{CDCl}_3$  (150 MHz)

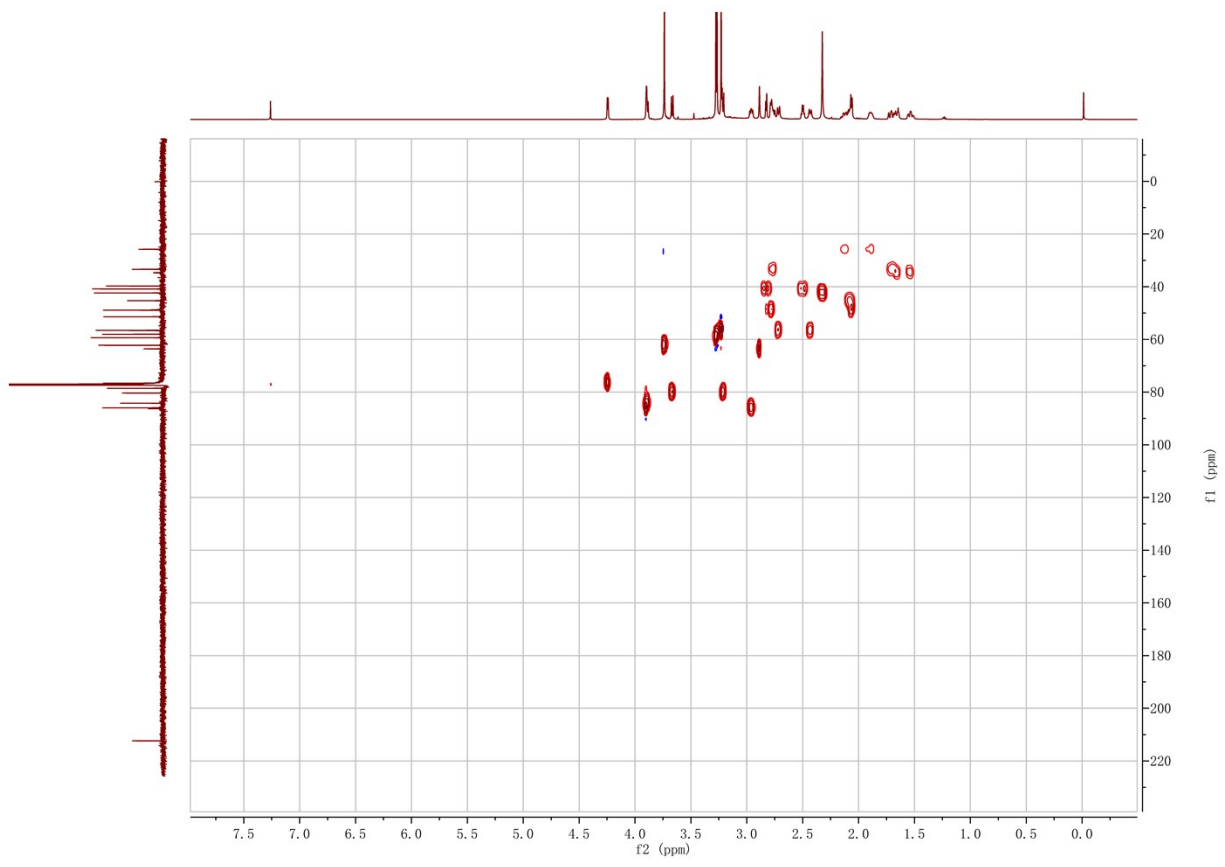

**Figure S47** The HSQC spectrum of compound **37** in CDCl<sub>3</sub>

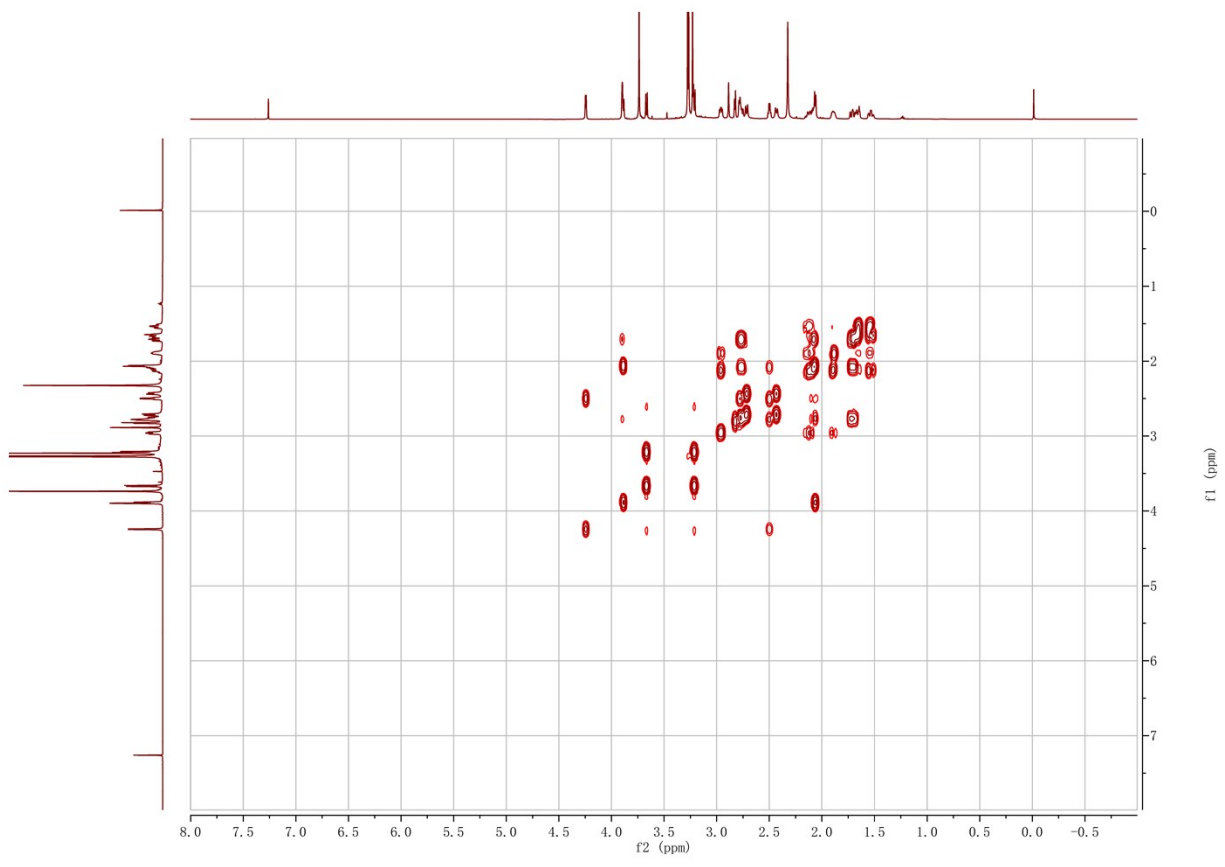

**Figure S48** The  $^1\text{H}$ - $^1\text{H}$  COSY spectrum of compound **37** in  $\text{CDCl}_3$

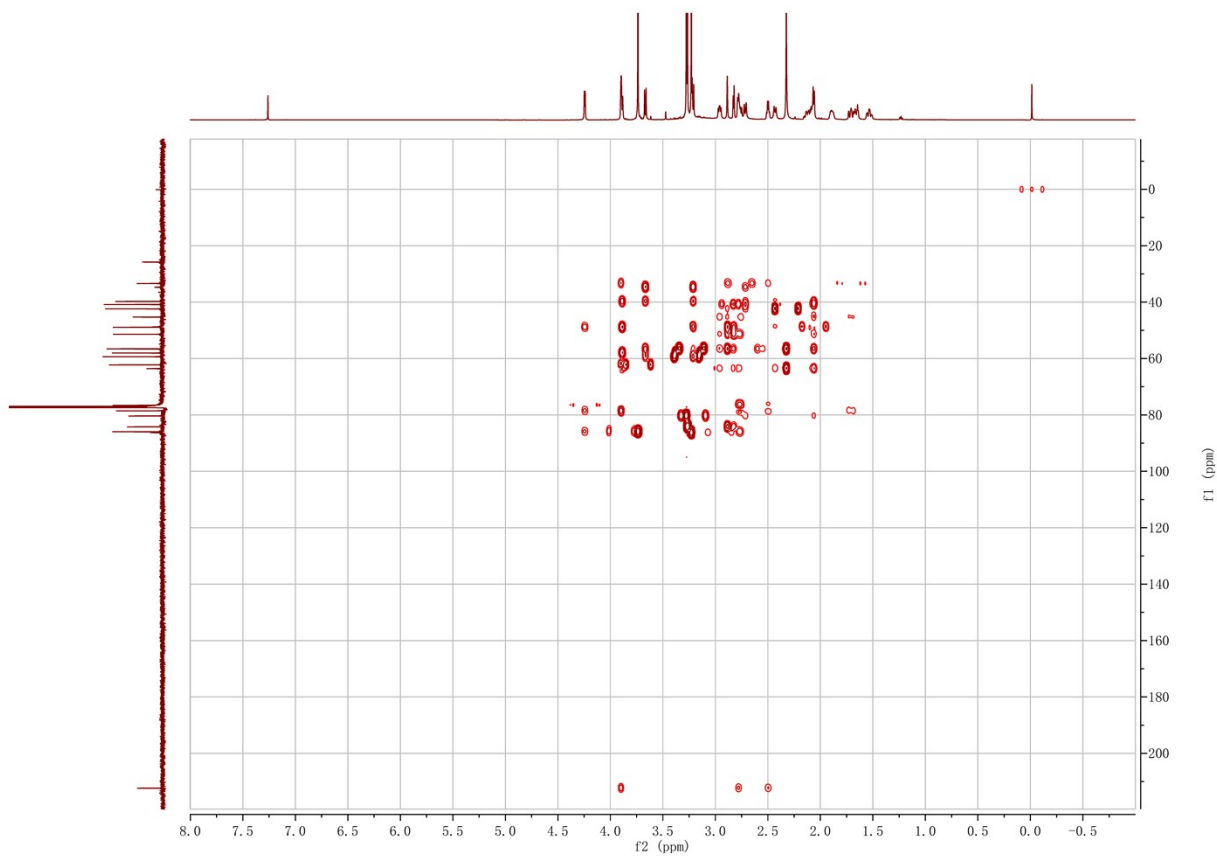

**Figure S49** The HMBC spectrum of compound **37** in  $\text{CDCl}_3$

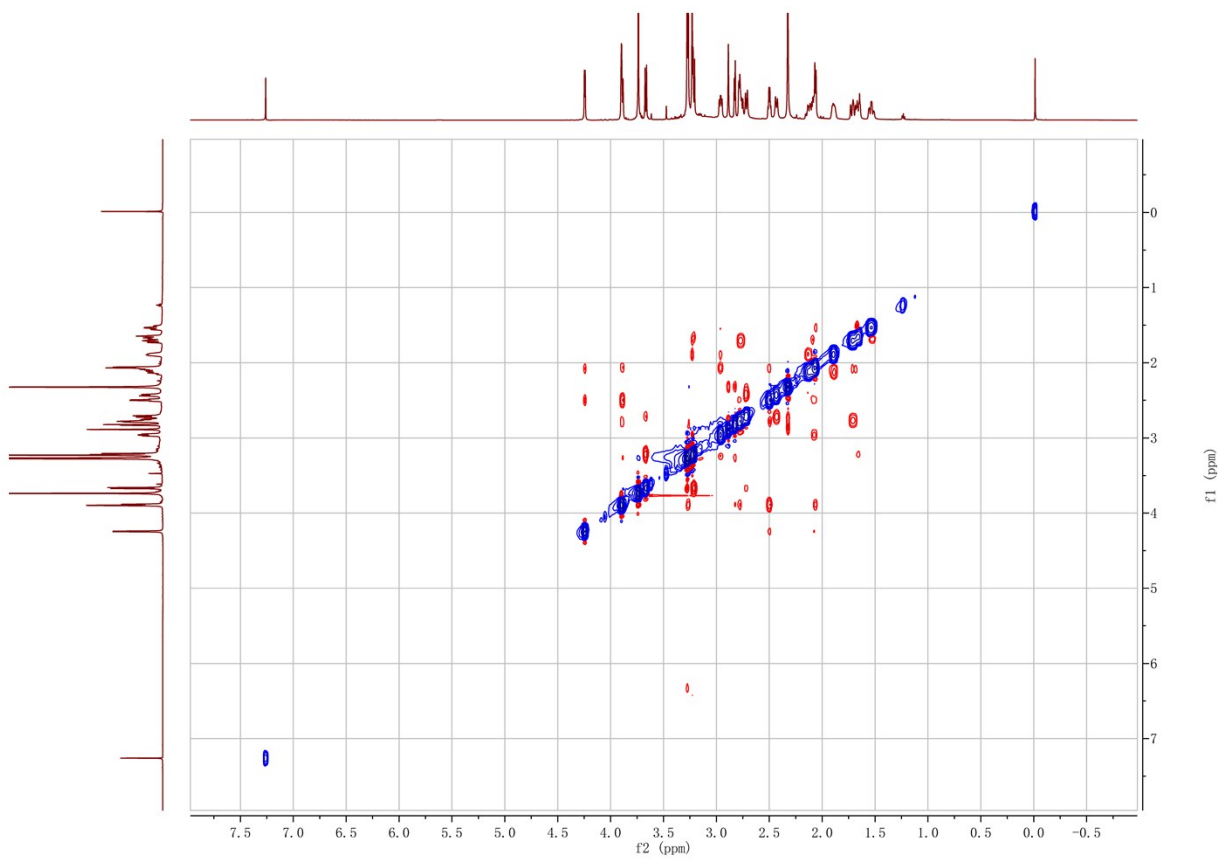

**Figure S50** The NOESY spectrum of compound **37** in CDCl<sub>3</sub>

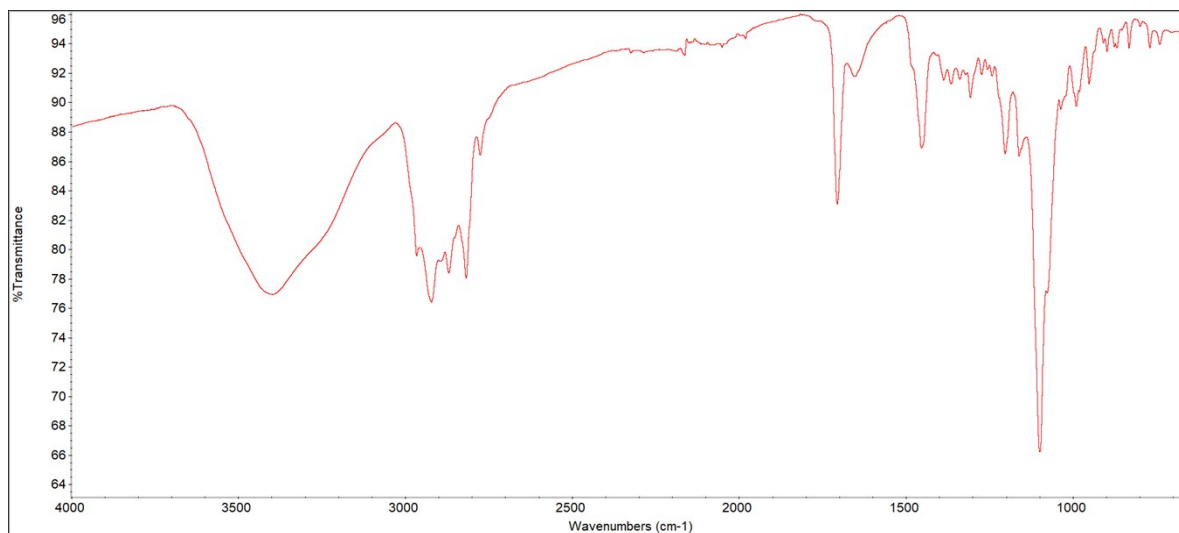

Figure S51 The IR spectrum of compound 37

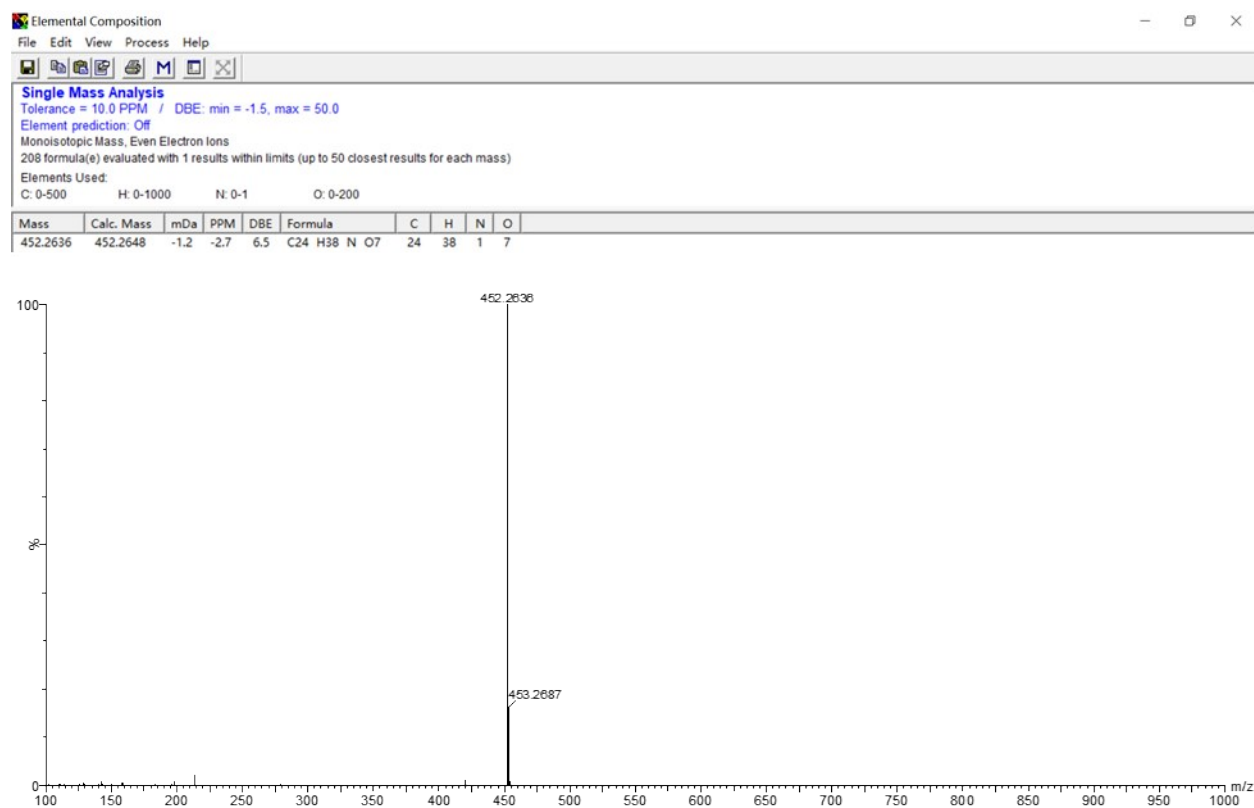

Figure S52 The HR-ESI-MS data of compound 37

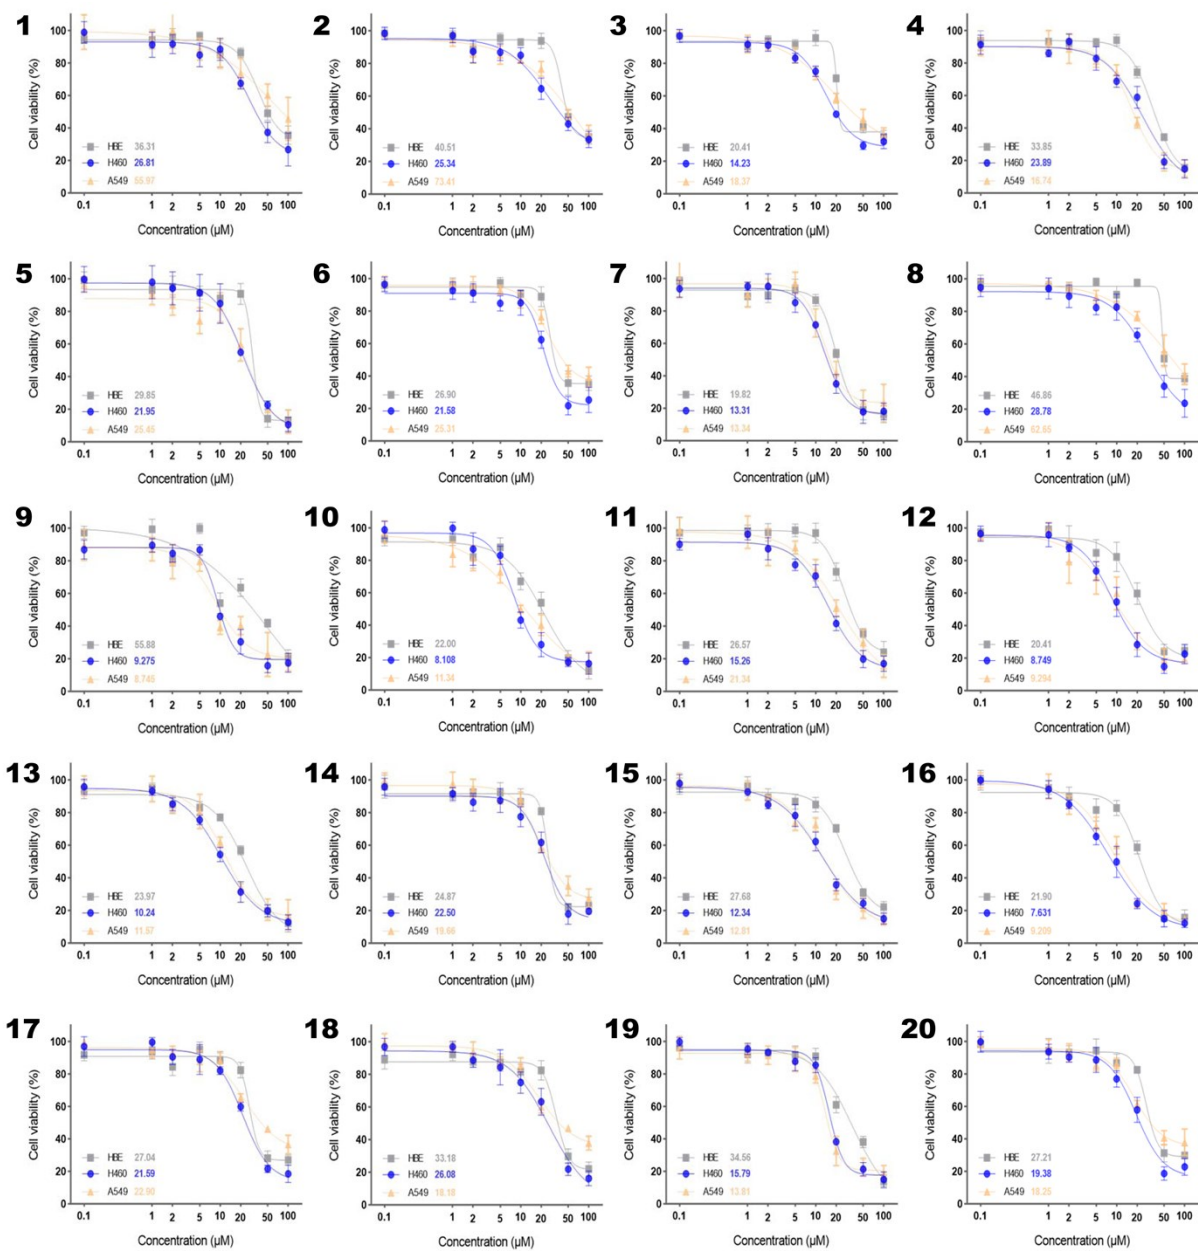

Figure S53 The representative IC<sub>50</sub> curves of compounds 1-20

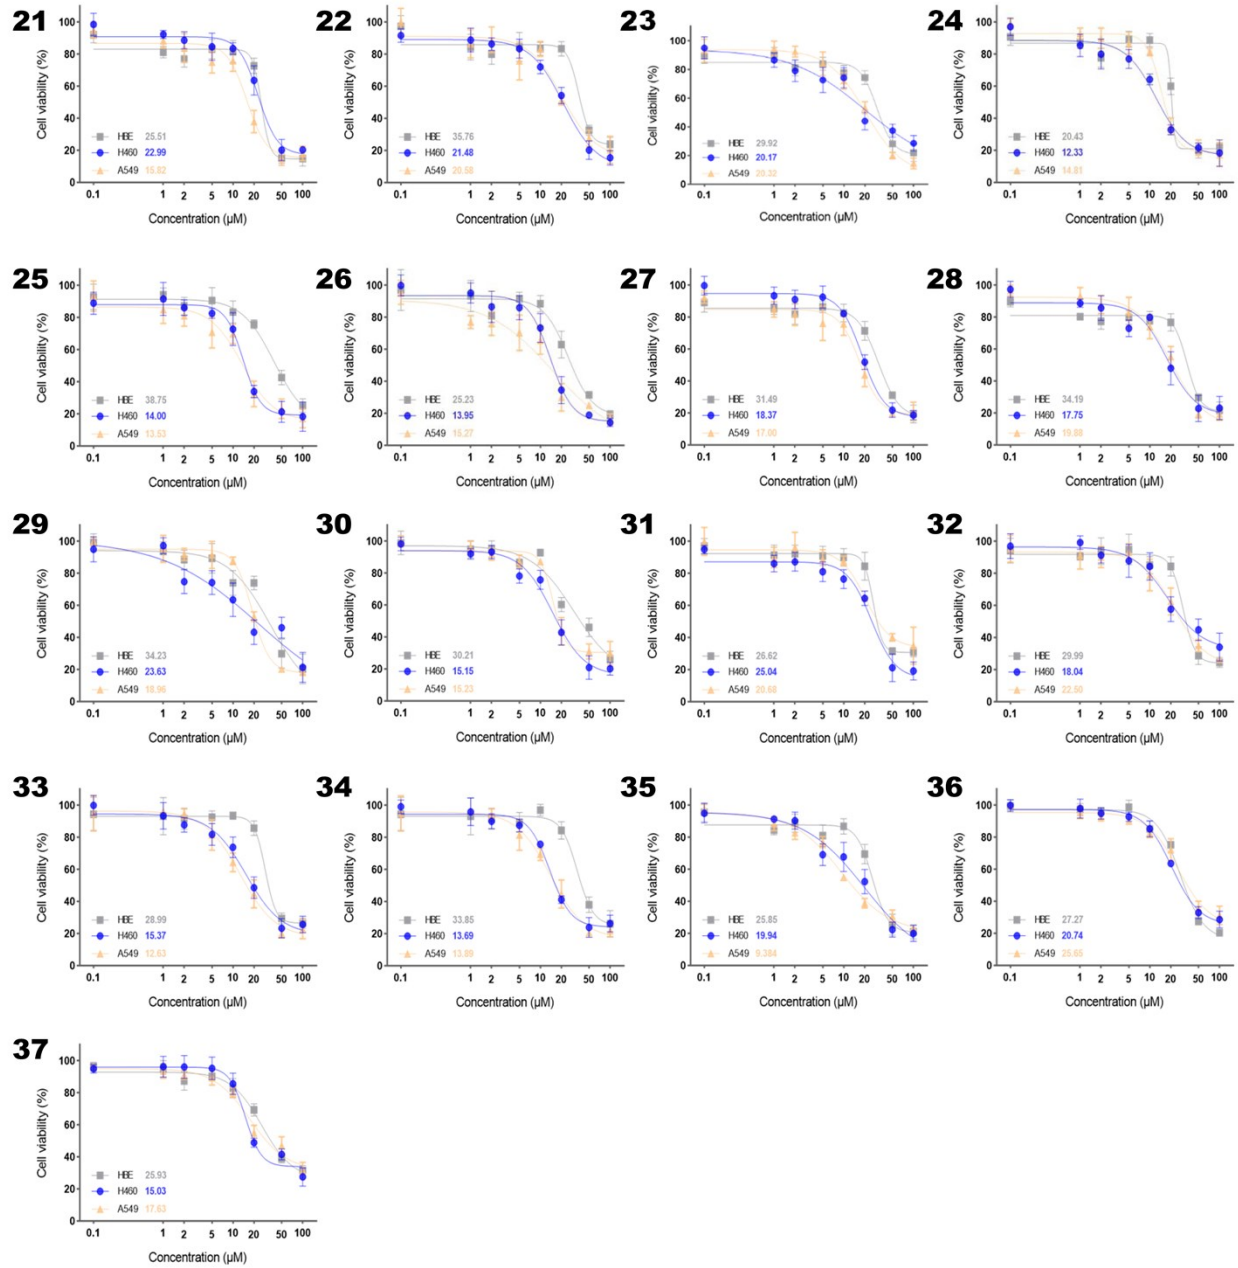

Figure S54 The representative IC<sub>50</sub> curves of compounds 21-37
